# Supplementary material for: Lactoferrin-derived Peptides Active towards Influenza: Identification of Three Potent Tetrapeptide Inhibitors
Source: PubMed Central journal article supplement (PMC5587682; doi:10.1038/s41598-017-10492-x), 2017-09-06
Supplement: 41598_2017_10492_MOESM1_ESM.pdf [file 41598_2017_10492_MOESM1_ESM.pdf]

SUPPORTING INFORMATION

**Lactoferrin-derived Peptides Active towards Influenza:  
Identification of Three Potent Tetrapeptide Inhibitors**

*Maria Carmina Scala<sup>1§</sup>, Marina Sala<sup>1§</sup>, Agostina Pietrantonio<sup>2§</sup>, Antonia Spensiero<sup>1</sup>, Simone Di Micco<sup>1</sup>, Mariangela Agamennone<sup>3</sup>, Alessia Bertamino<sup>1</sup>, Ettore Novellino<sup>4</sup>, Giuseppe Bifulco<sup>1</sup>, Isabel M. Gomez-Monterrey<sup>4</sup>, Fabiana Superti<sup>2\*</sup>, Pietro Campiglia<sup>1\*</sup>*

<sup>1</sup> Department of Pharmacy, University of Salerno, Via Giovanni Paolo II 132, 84084, Fisciano, Italy

<sup>2</sup> National Institute of Health, Viale Regina Elena 299, 00161, Rome, Italy

<sup>3</sup> Department of Pharmacy, University of Chieti “G. d’Annunzio”, Via dei Vestini 31, 66100, Chieti Italy

<sup>4</sup> Department of Pharmacy, University of Naples “Federico II”, Via D. Montesano 49, 80131, Napoli, Italy

\* To whom correspondence may be addressed: [pcampigl@unisa.it](mailto:pcampigl@unisa.it) and [fabiana.superti@iss.it](mailto:fabiana.superti@iss.it)

§ These authors contributed equally to this work

**Table of Contents:**

|                                                                                                                                                      |     |
|------------------------------------------------------------------------------------------------------------------------------------------------------|-----|
| Title, Affiliations, Table of Contents.....                                                                                                          | S1  |
| Docked poses of the bLf C-lobe on the HA ( <b>Figure S1</b> ) .....                                                                                  | S2  |
| Analytical data of peptides <b>4-17</b> ( <b>Table S1</b> ).....                                                                                     | S3  |
| HRMS spectra and HPLC chromatograms of peptide <b>4-17</b> ( <b>Figure S2-S15</b> ) .....                                                            | S3  |
| Sensorgram of peptide <b>4</b> ( <b>Figure S16</b> ) .....                                                                                           | S24 |
| <sup>1</sup> H chemical shifts (ppm) of <b>1</b> in HFA/H <sub>2</sub> O (600 MHz, 300 K) ( <b>Table S2</b> ) .....                                  | S25 |
| <sup>1</sup> H chemical shifts (ppm) of <b>13</b> in HFA/H <sub>2</sub> O (600 MHz, 300 K) ( <b>Table S3</b> ) .....                                 | S26 |
| <sup>1</sup> H chemical shifts (ppm) of <b>14</b> in HFA/H <sub>2</sub> O (600 MHz, 300 K) ( <b>Table S4</b> ) .....                                 | S26 |
| <sup>1</sup> H chemical shifts (ppm) of <b>15</b> in HFA/H <sub>2</sub> O (600 MHz, 300 K) ( <b>Table S5</b> ) .....                                 | S27 |
| <sup>1</sup> H chemical shifts (ppm) of <b>17</b> in [D <sub>6</sub> ]DMSO (600 MHz, 300 K) ( <b>Table S6</b> ) .....                                | S27 |
| Mean values of φ, ψ and χ <sub>1</sub> angles and αC distances relative to the most representative conformers of <b>1</b> ( <b>Table S7</b> ) .....  | S27 |
| Mean values of φ, ψ and χ <sub>1</sub> angles and αC distances relative to the most representative conformers of <b>13</b> ( <b>Table S8</b> ) ..... | S28 |

|                                                                                                                             |     |
|-----------------------------------------------------------------------------------------------------------------------------|-----|
| <sup>1</sup> H chemical shifts (ppm) of <b>4</b> in HFA/H <sub>2</sub> O (600 MHz, 300 K). (Table S9) .....                 | S28 |
| 2D-NOESY spectrum of <b>1</b> HFA/H <sub>2</sub> O solution (600 MHz, 300 K, t <sub>mix</sub> = 400 ms) (Figure S17) .....  | S29 |
| Ramachandran plot of NMR derived bundle of <b>1</b> , calculated by PROCHECK software (Figure S18) ..                       | S30 |
| .....                                                                                                                       | S30 |
| 2D-NOESY spectrum of <b>4</b> HFA/H <sub>2</sub> O solution (600 MHz, 300 K, t <sub>mix</sub> = 300 ms) (Figure S19) .....  | S31 |
| Ramachandran plot of NMR derived bundle of <b>4</b> , calculated by PROCHECK <sup>i</sup> software (Figure S20) ..          | S32 |
| .....                                                                                                                       | S32 |
| 2D-NOESY spectrum of <b>13</b> HFA/H <sub>2</sub> O solution (600 MHz, 300 K, t <sub>mix</sub> = 500 ms) (Figure S21) ..... | S33 |
| Ramachandran plot of NMR derived bundle of <b>13</b> , calculated by PROCHECK <sup>i</sup> software (Figure S22) ..         | S34 |
| .....                                                                                                                       | S34 |
| References.....                                                                                                             | S34 |

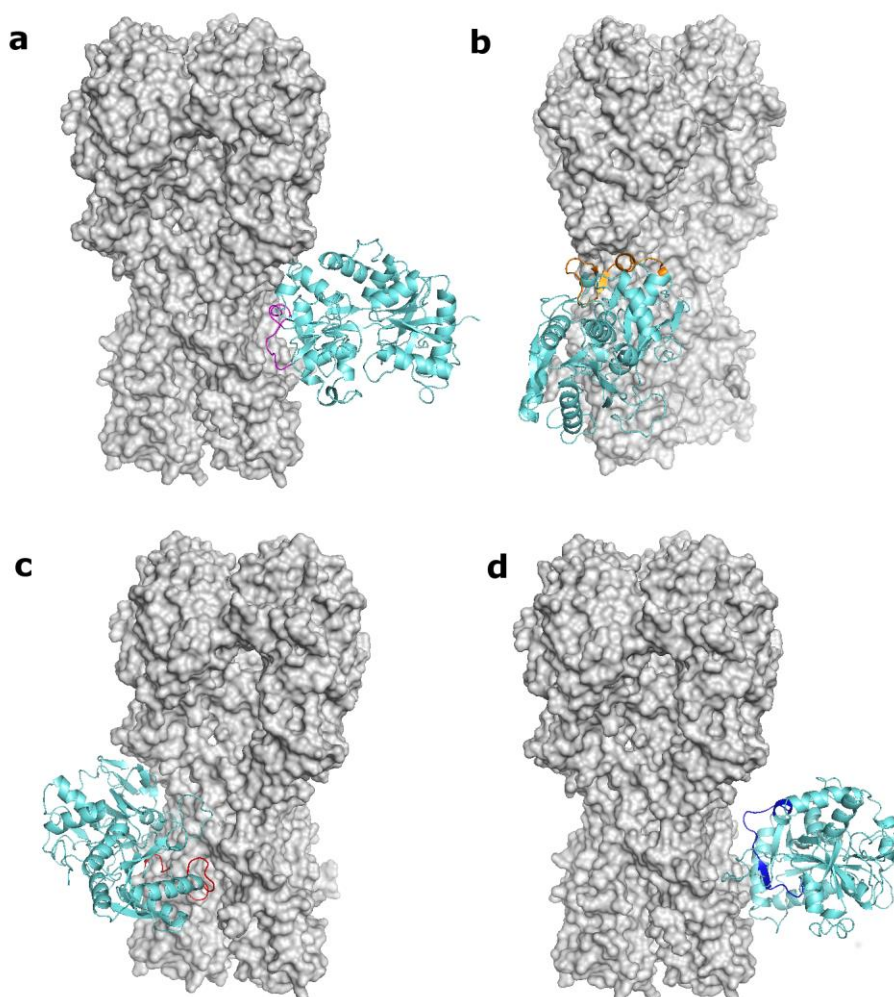

**Figure S1.** Docked poses of the bLf C-lobe (cyan cartoon) on the HA (grey surface) highlighting the potential role of selected loop sequences. Selected sequences are colored: a) peptide **4** (purple); b) peptide **5** (orange); c) peptides **7** and **8** (red); d) peptide **9** (blue).

**Table S1.** Analytical data of peptides 4-17.

| Pep. | Sequence                | HPLC<br>k' <sup>a</sup> | HRMS       |
|------|-------------------------|-------------------------|------------|
| 4    | KANEGLTWNSLKDK          | 6.47                    | 1602.85134 |
| 5    | TGSCAFDEFFSQSCAPGADPKSR | 6.89                    | 2408.02628 |
| 6    | TNGESTADWAKN            | 5.07                    | 1292.58779 |
| 7    | GKNGKNCPDKFC            | 4.26                    | 1308.58370 |
| 8    | KSETKN                  | 5.22                    | 706.37420  |
| 9    | NDNTECLAKLGGRPTYEE      | 5.76                    | 2009.92731 |
| 10   | NRKSSKHSSLDCVLRPTEGY    | 6.08                    | 2278.15056 |
| 11   | NRKSSKHSSLDCVLRP        | 5.71                    | 1825.98013 |
| 12   | SKHSSLDCVLRPTEGY        | 2.45                    | 1791.87152 |
| 13   | SLDCVLRP                | 6.67                    | 901.49417  |
| 14   | VLRP                    | 5.70                    | 525.35082  |
| 15   | SLDC                    | 3.93                    | 477.18970  |
| 16   | SKHSSLDC                | 4.14                    | 876.38864  |
| 17   | SKHS                    | 4.68                    | 499.26235  |

<sup>a</sup>k'=[(peptide retention time-solvent retention time)/solvent retention time].

### Supplementary figures of Mass spectrometry and HPLC of peptides used in the study

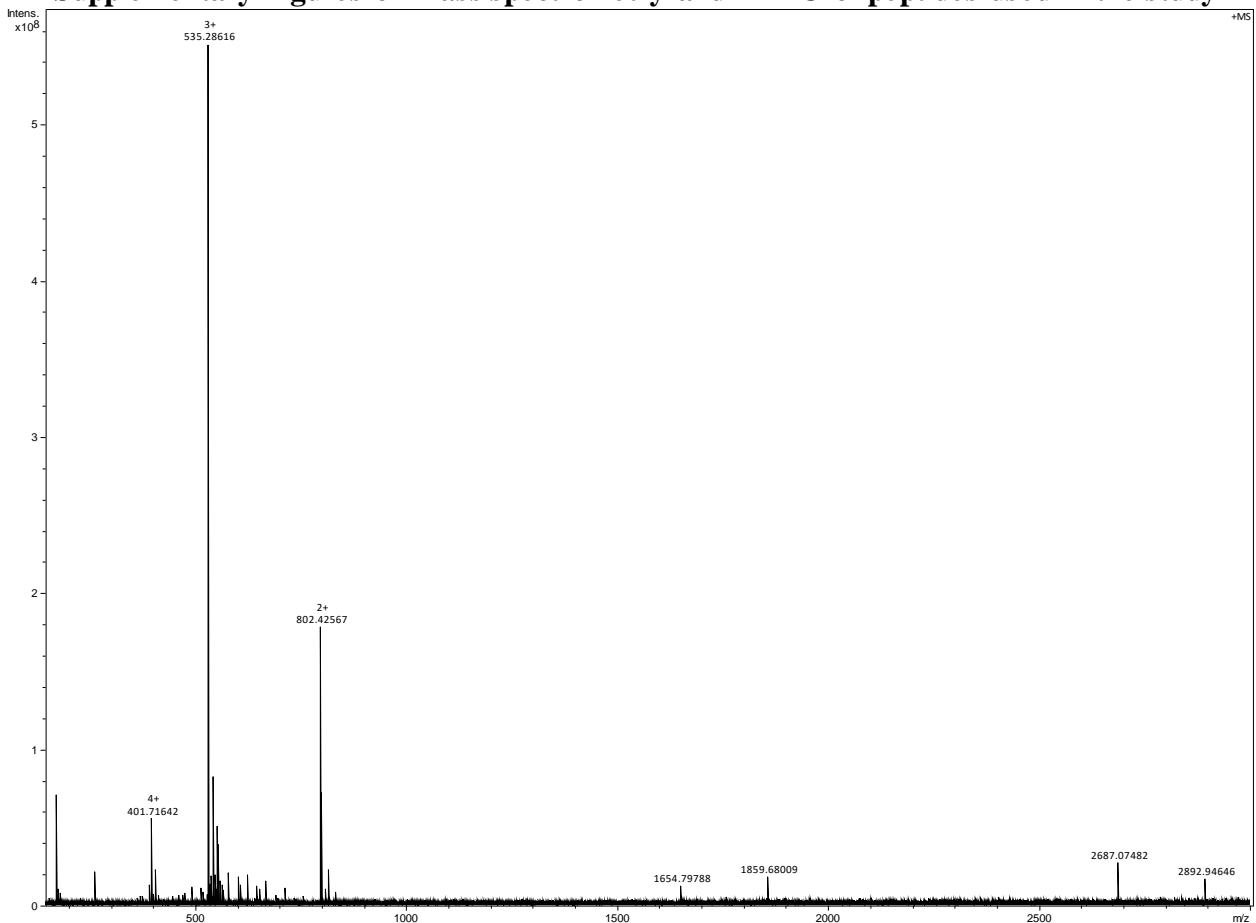

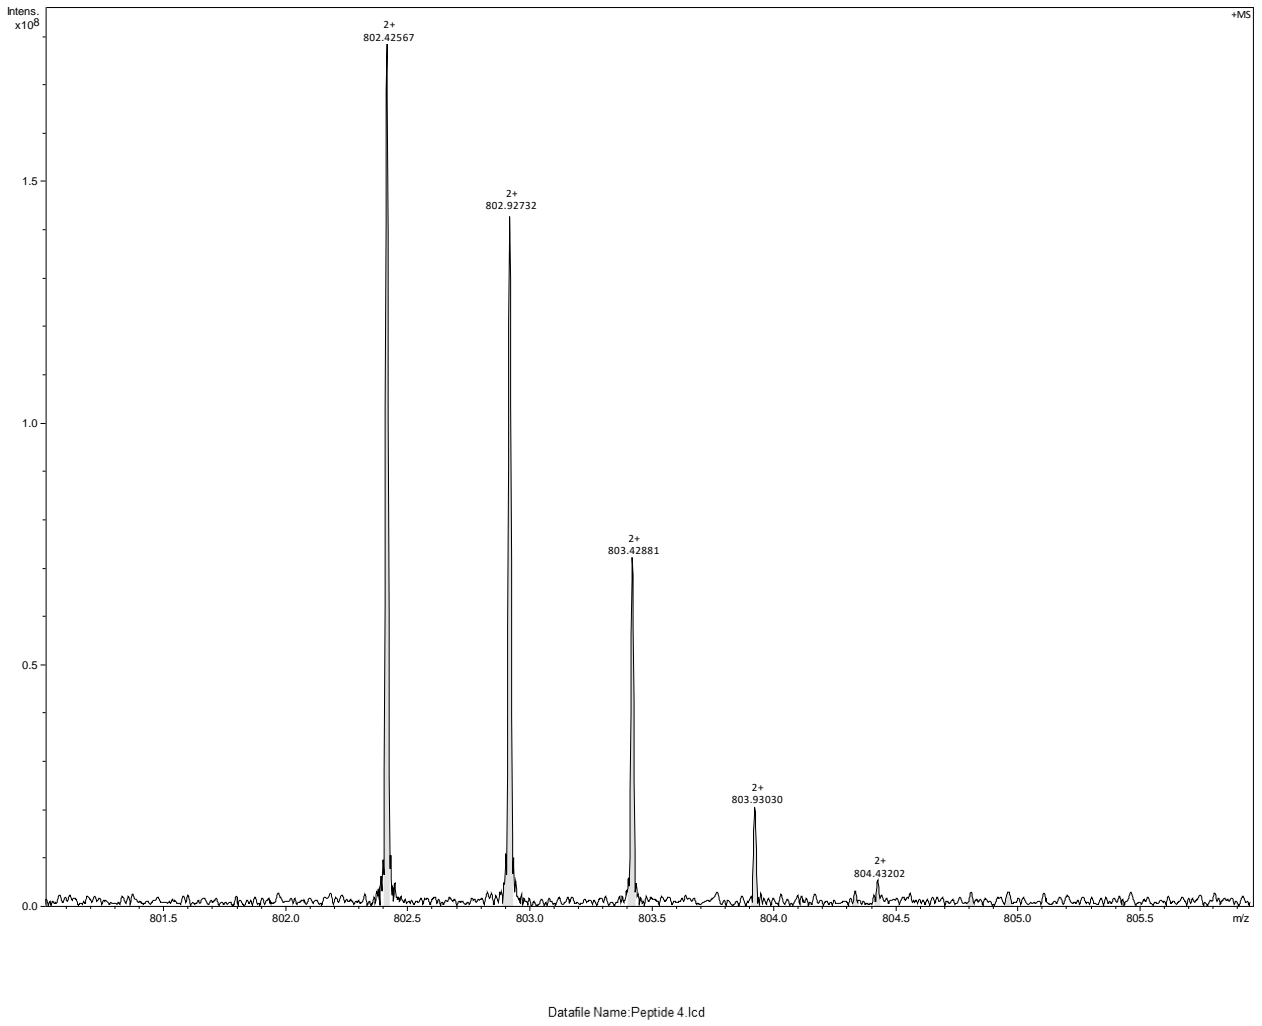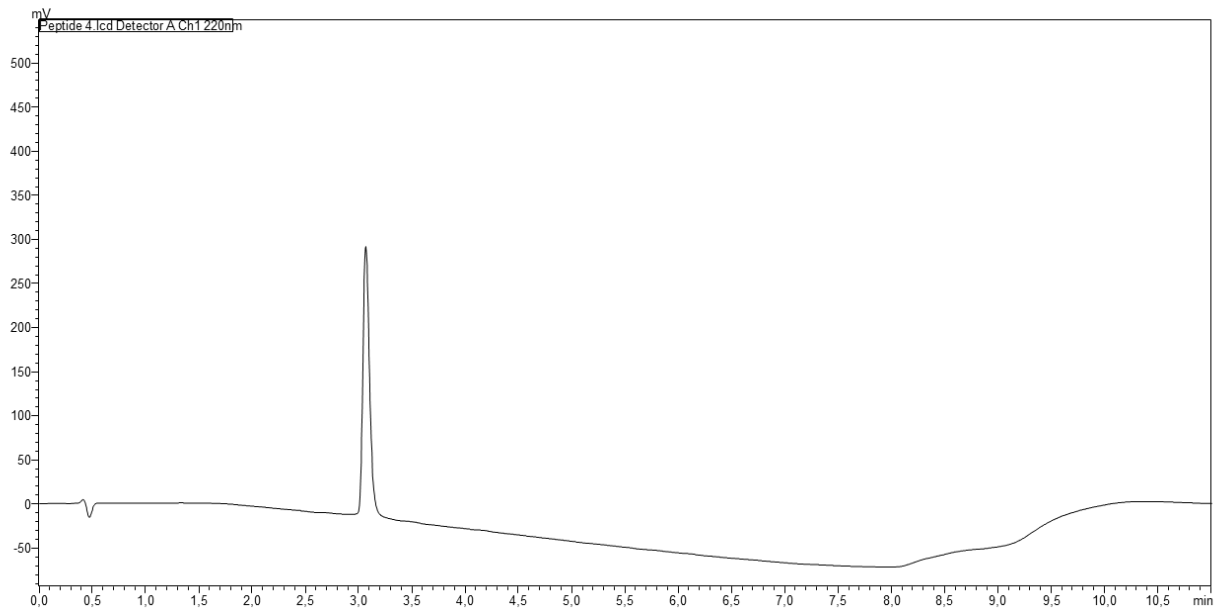

**Figure S2.** HR-ESI-MS of Peptide 4 ion  $[M+H]^{2+}$  and analytical HPLC trace at 220 nm.

# Lactoferrin-derived Peptides Active towards Influenza

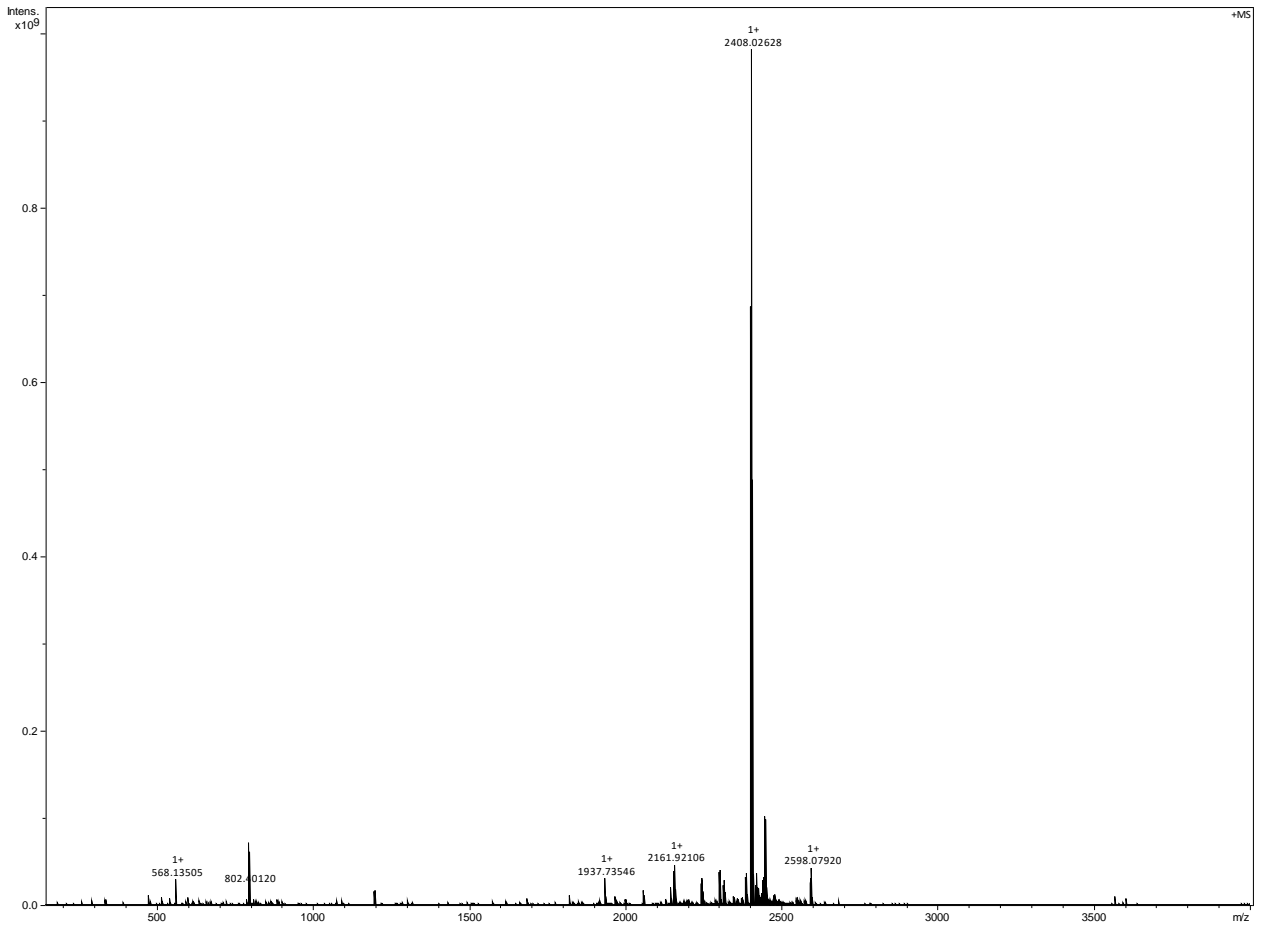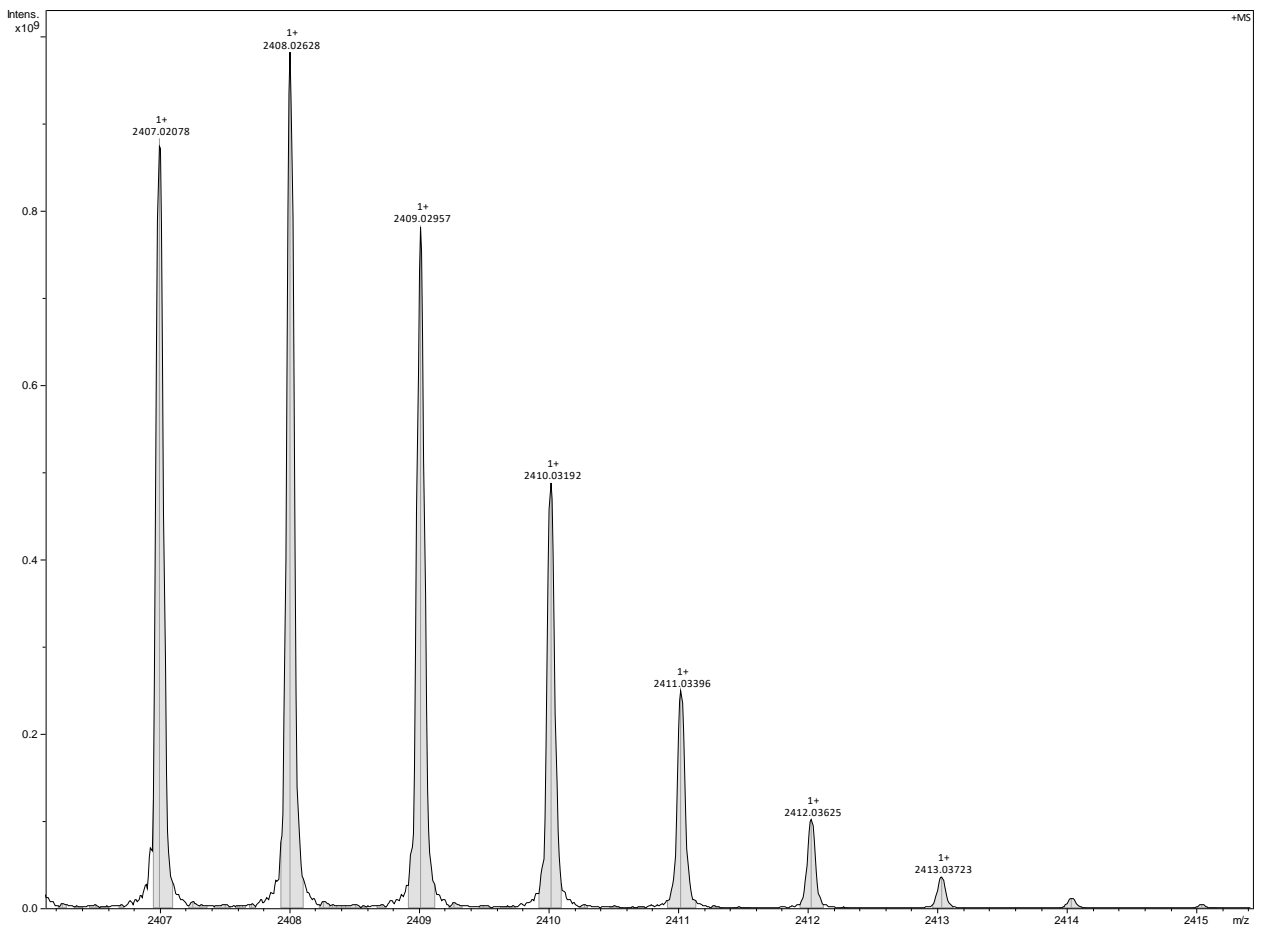

# Lactoferrin-derived Peptides Active towards Influenza

Datafile Name: Peptide 5.lcd

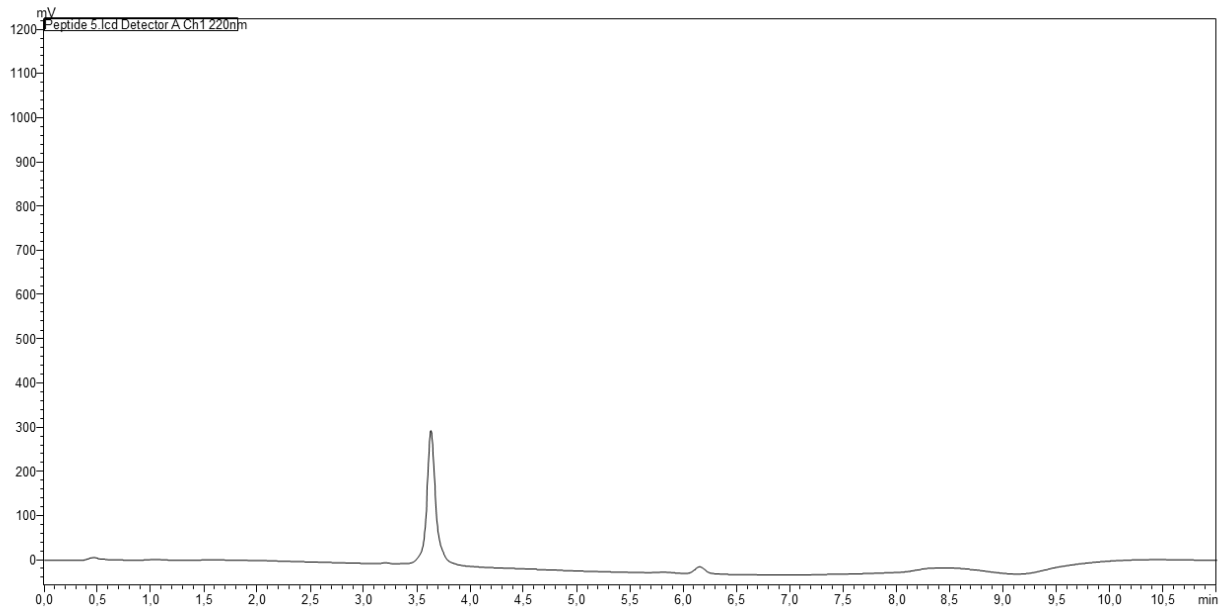

**Figure S3.** HR-MALDI-MS of Peptide 5 ion  $[M+H]^+$  and analytical HPLC trace at 220 nm.

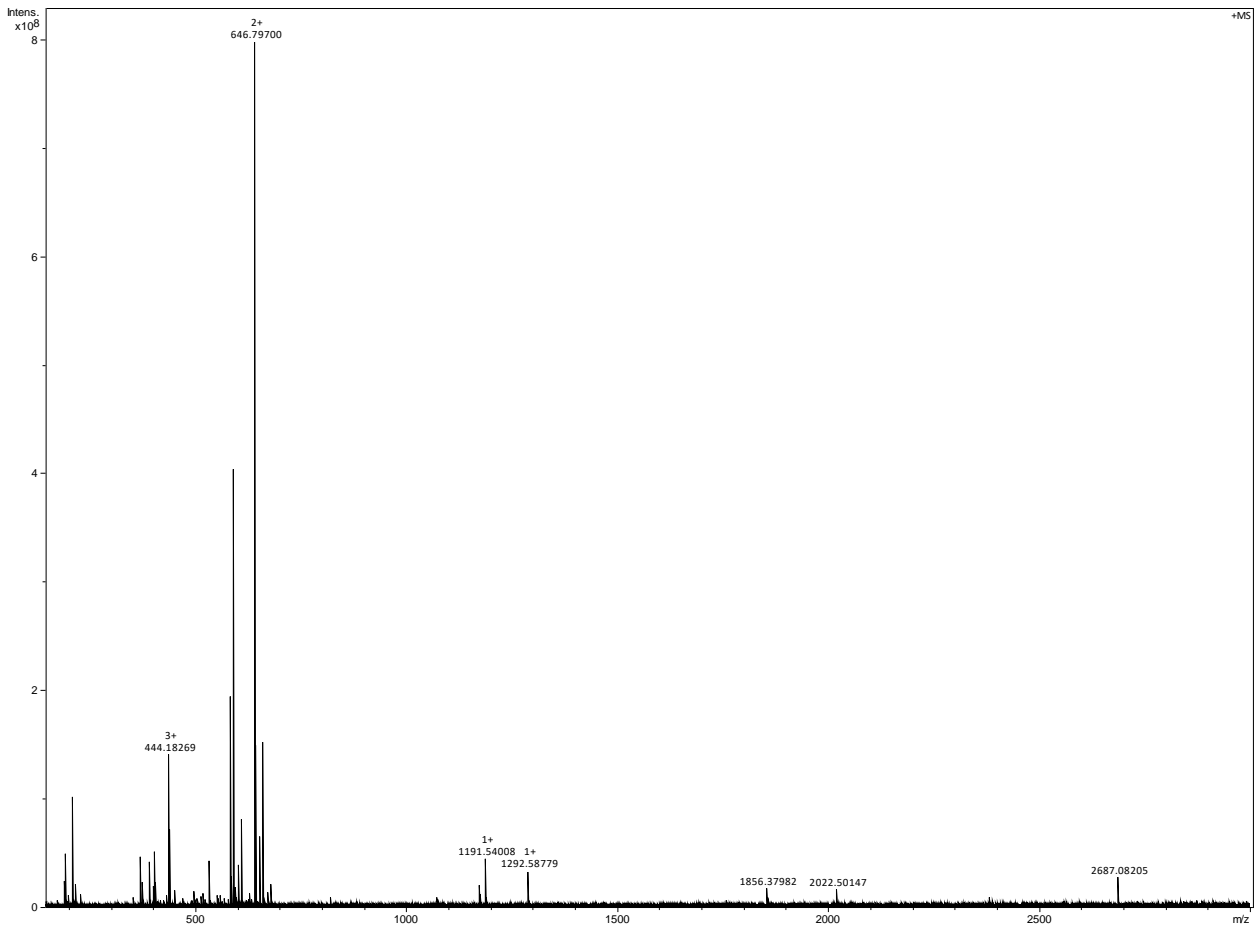

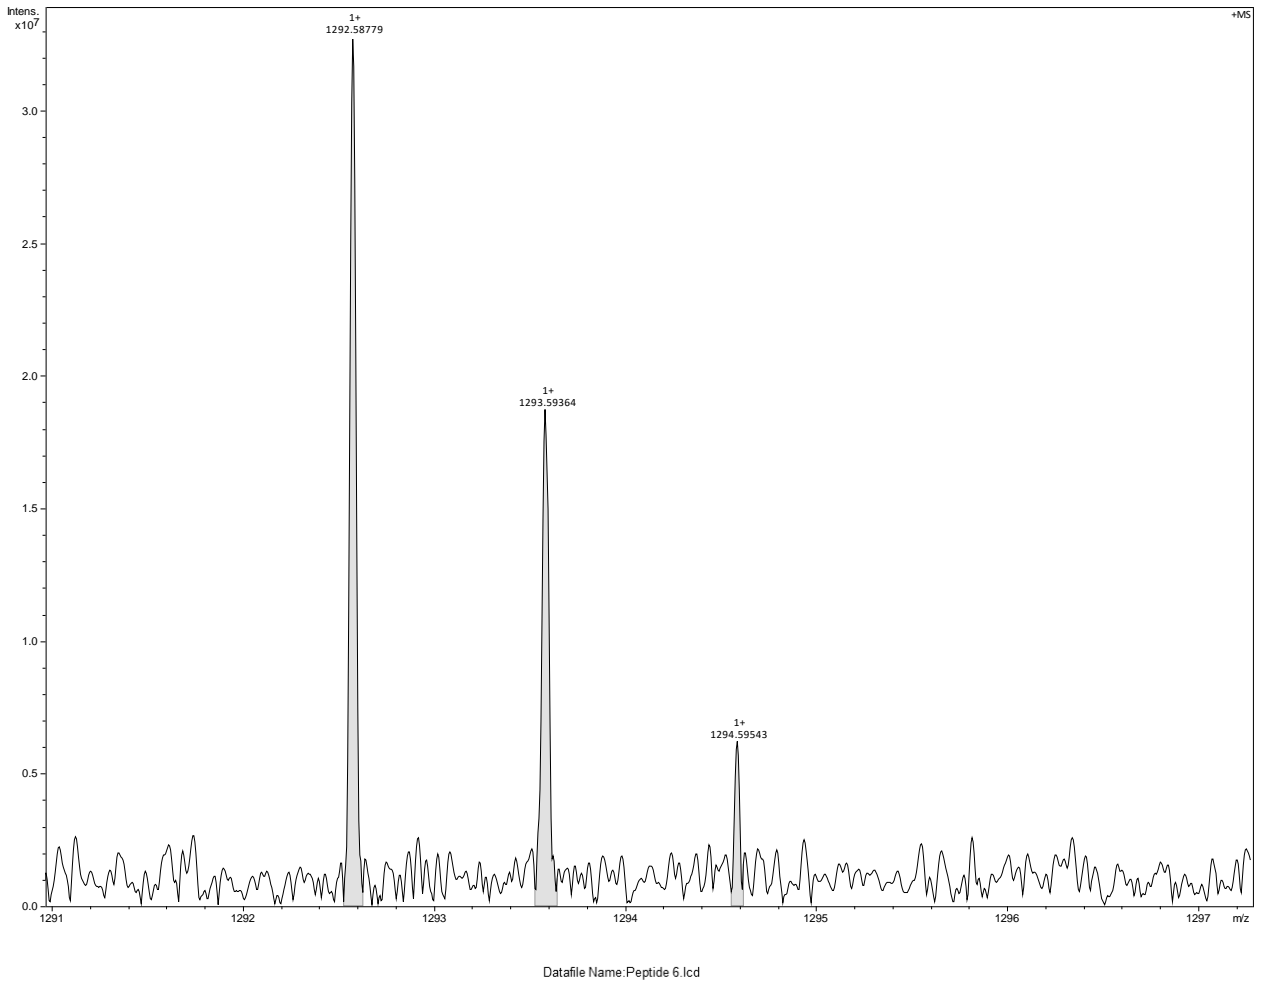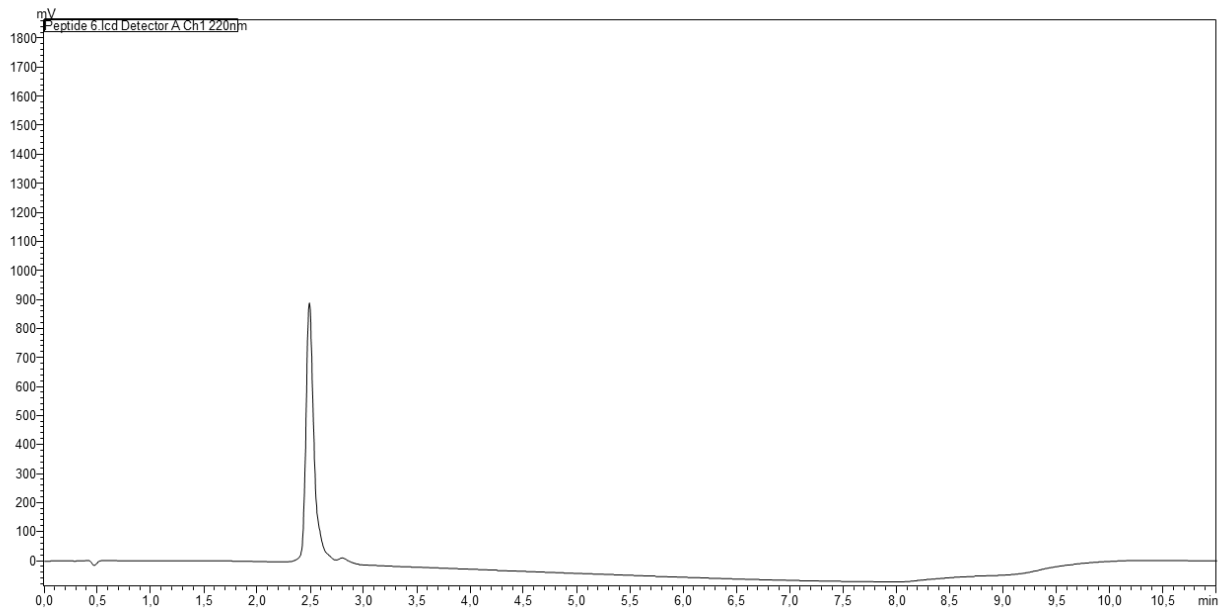

**Figure S4.** HR-ESI-MS of Peptide 6 ion  $[M+H]^+$  and analytical HPLC trace at 220 nm.

# Lactoferrin-derived Peptides Active towards Influenza

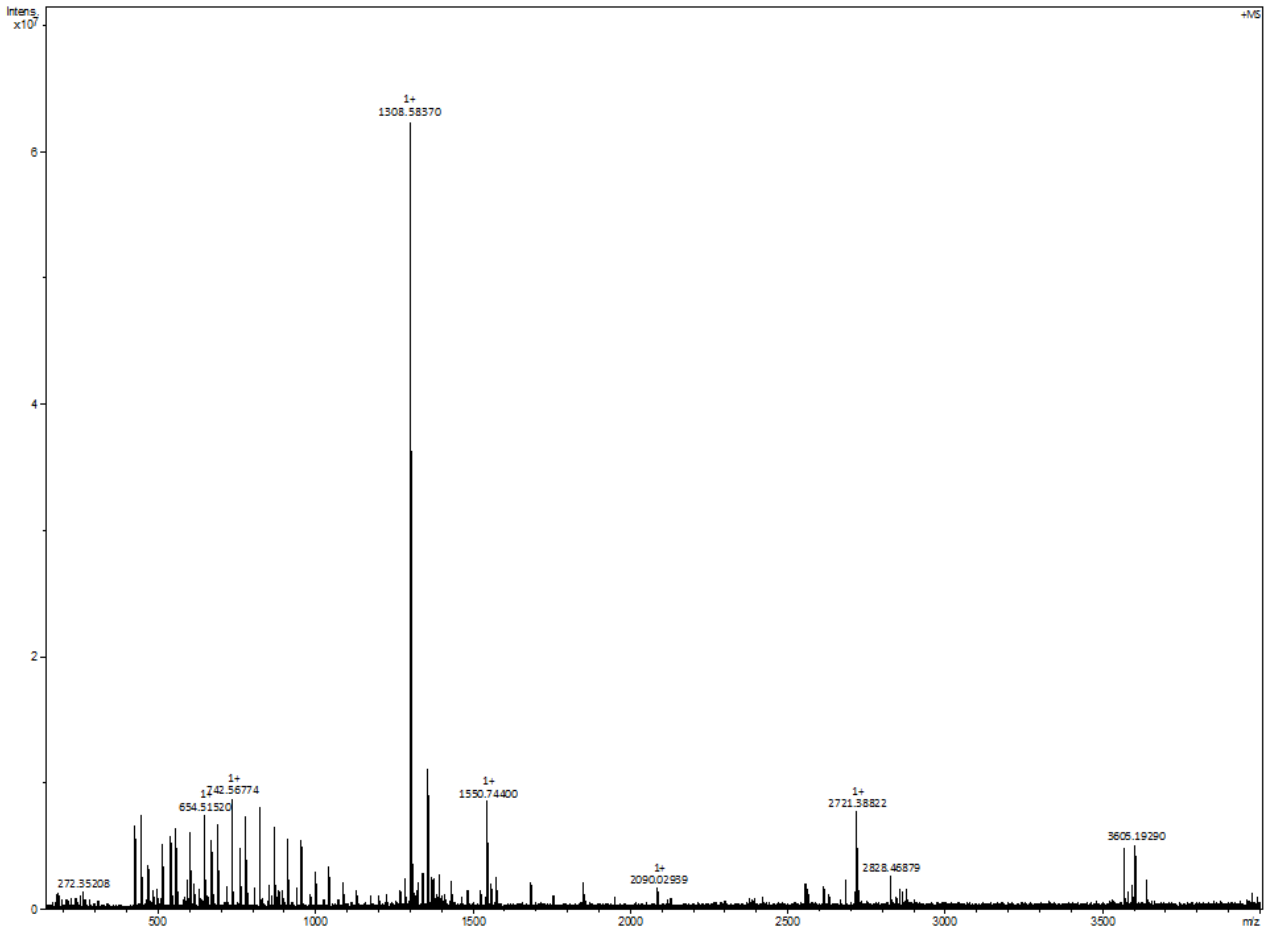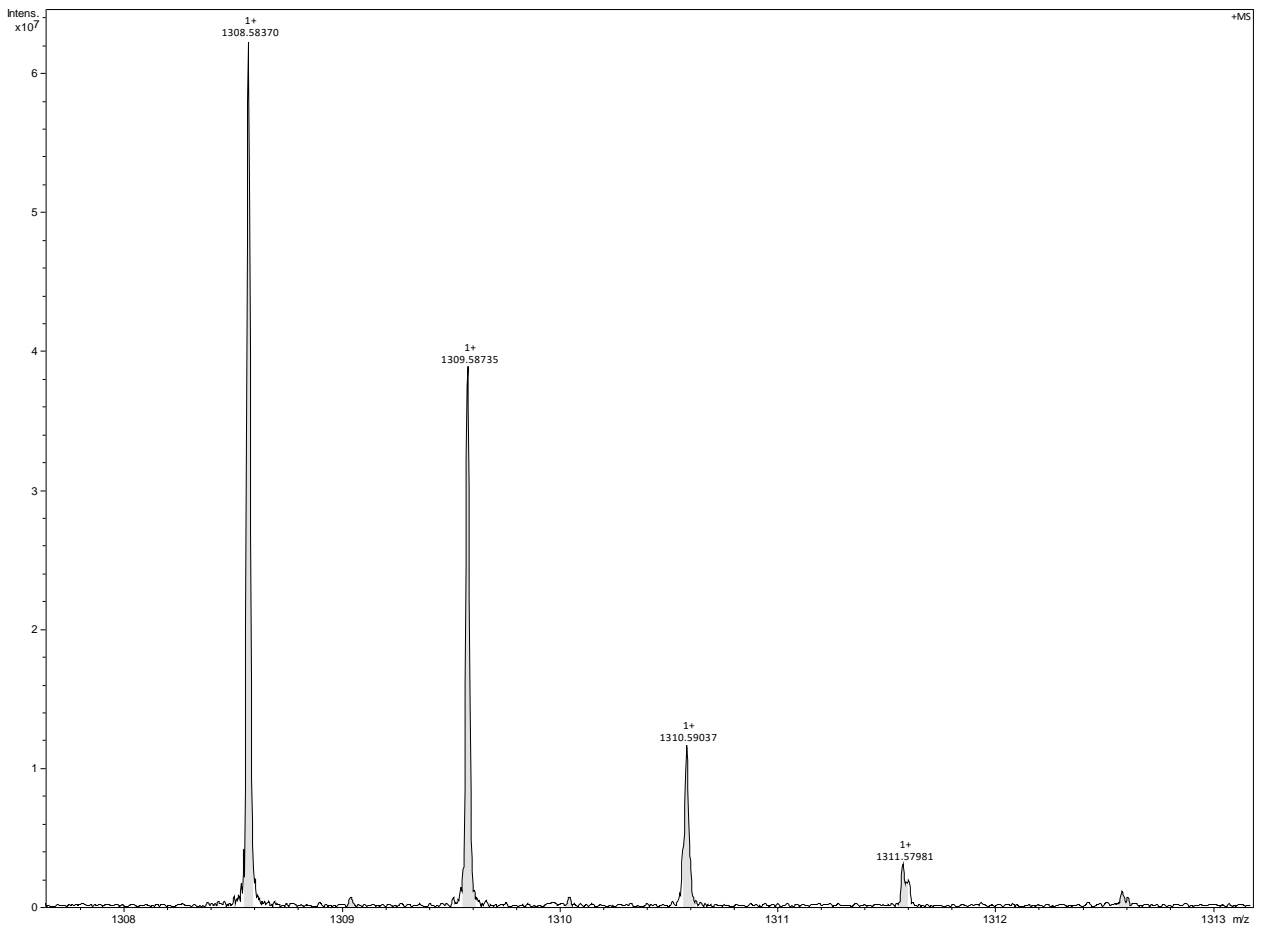



Datafile Name: Peptide 7.lcd

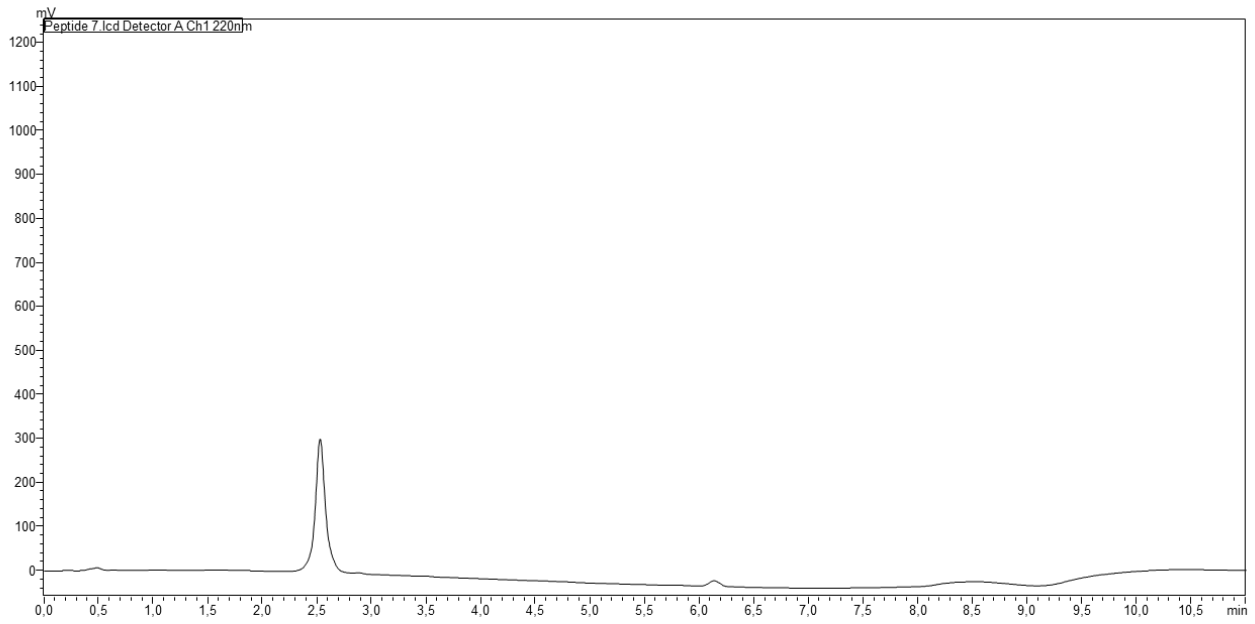

Figure S5. HR-MALDI-MS of Peptide 7 ion  $[M+H]^+$  and analytical HPLC trace at 220 nm.

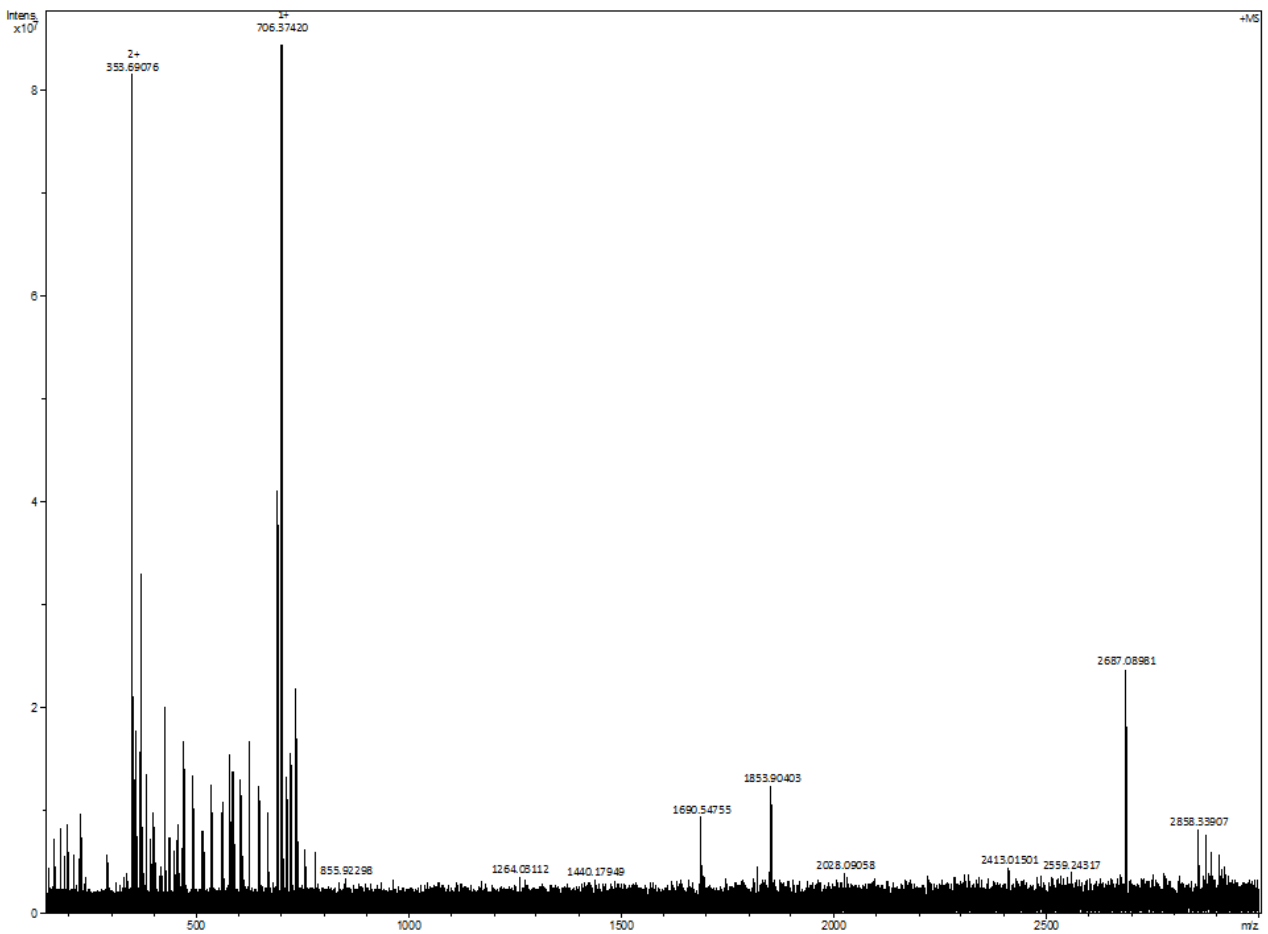

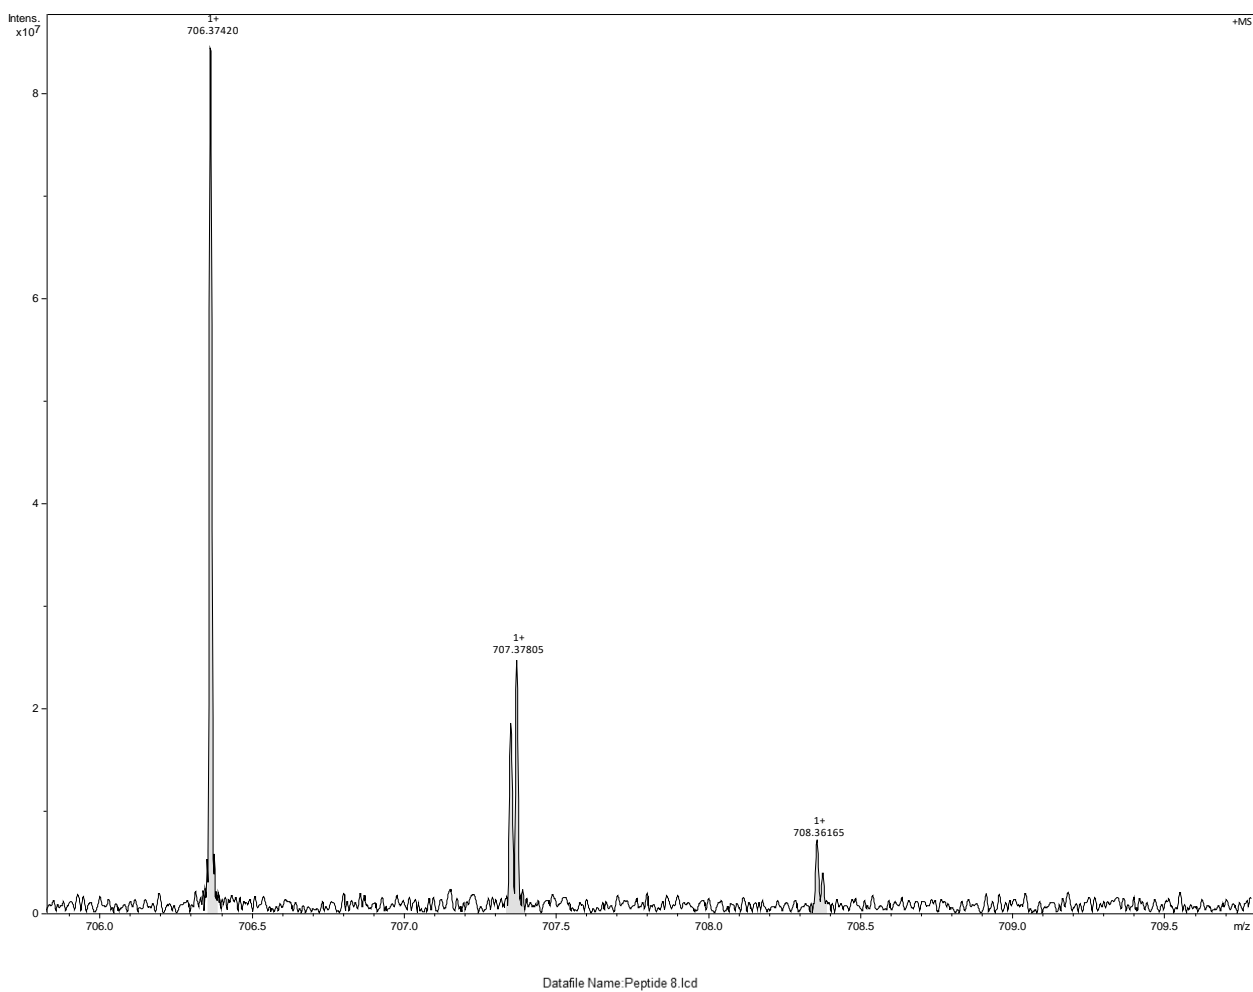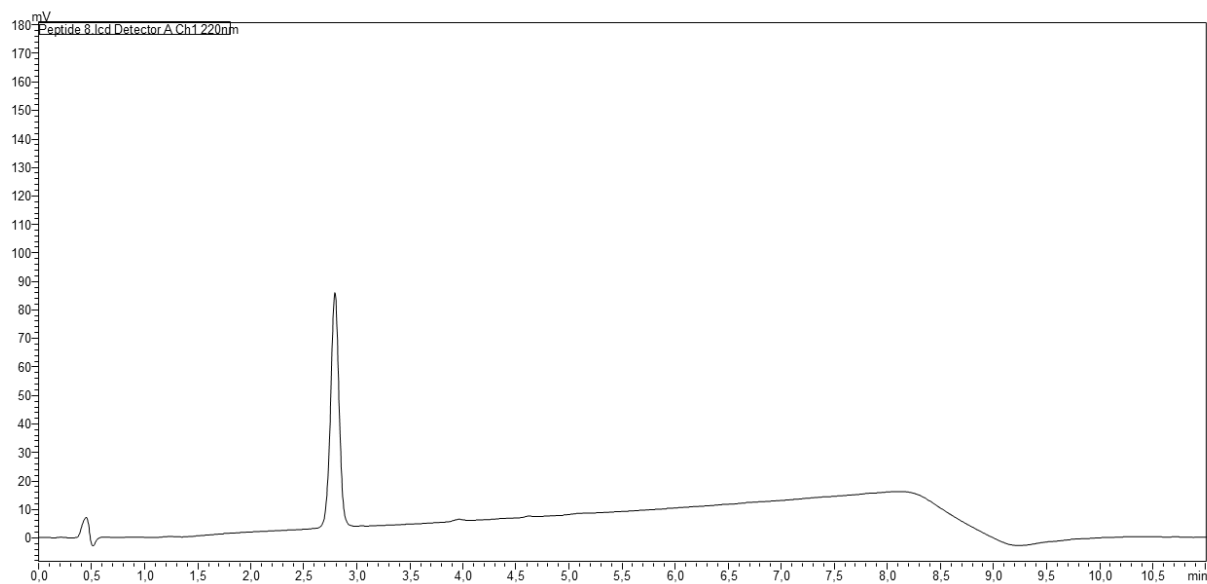

**Figure S6.** HR-ESI-MS of Peptide **8** ion  $[M+H]^+$  and analytical HPLC trace at 220 nm.

# Lactoferrin-derived Peptides Active towards Influenza

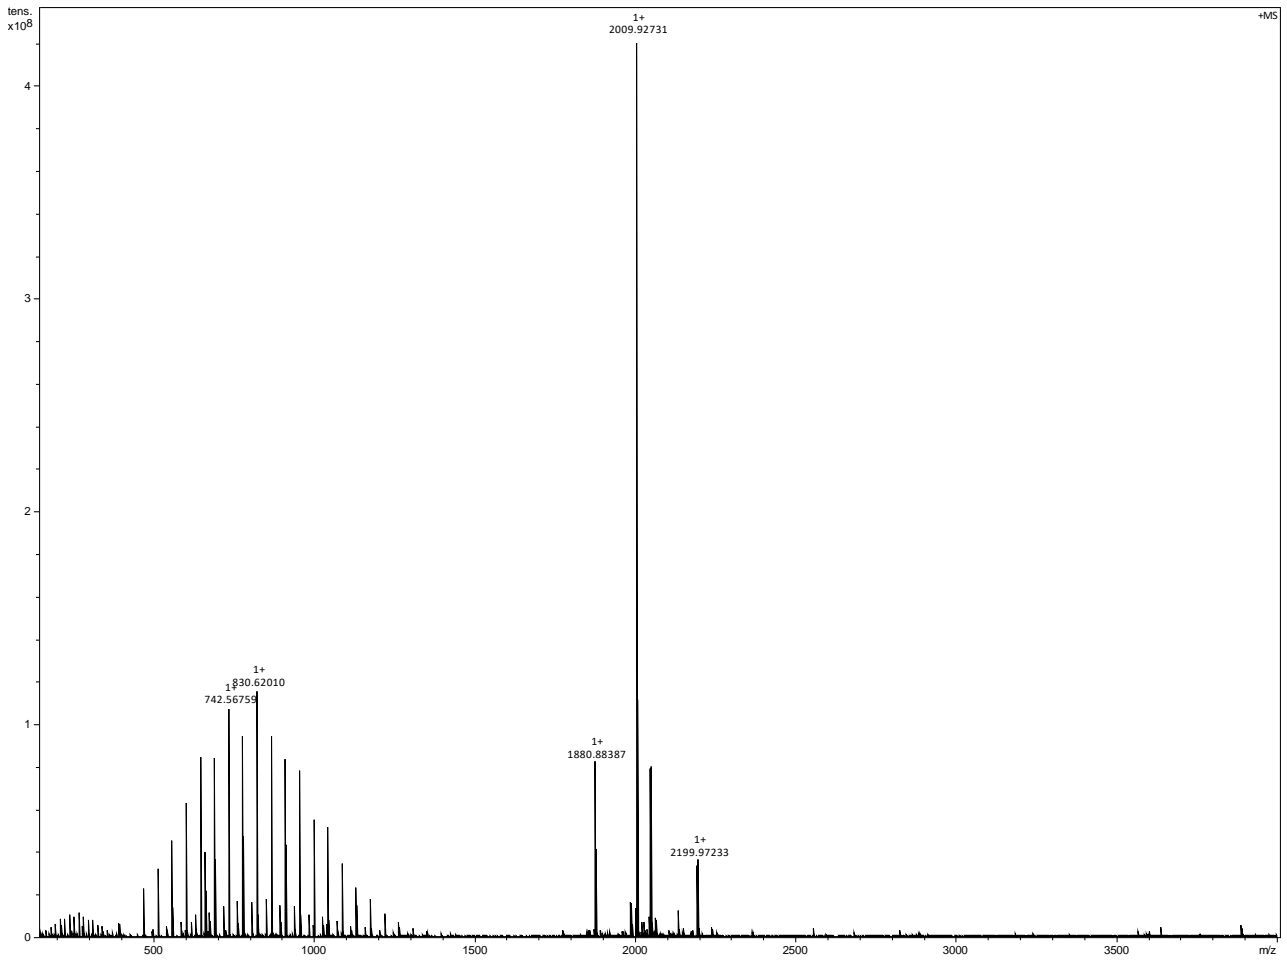

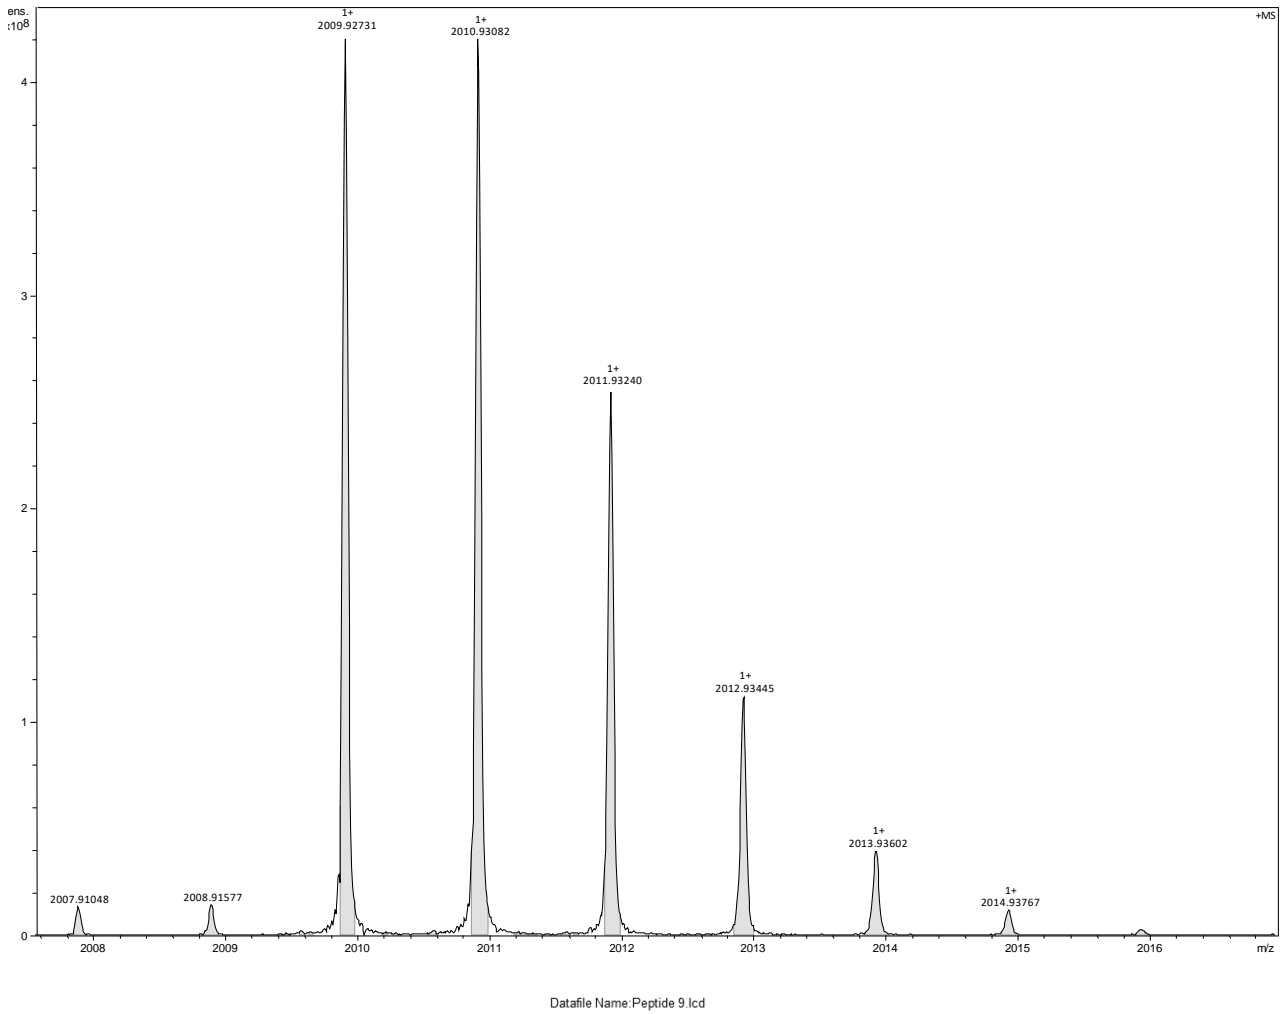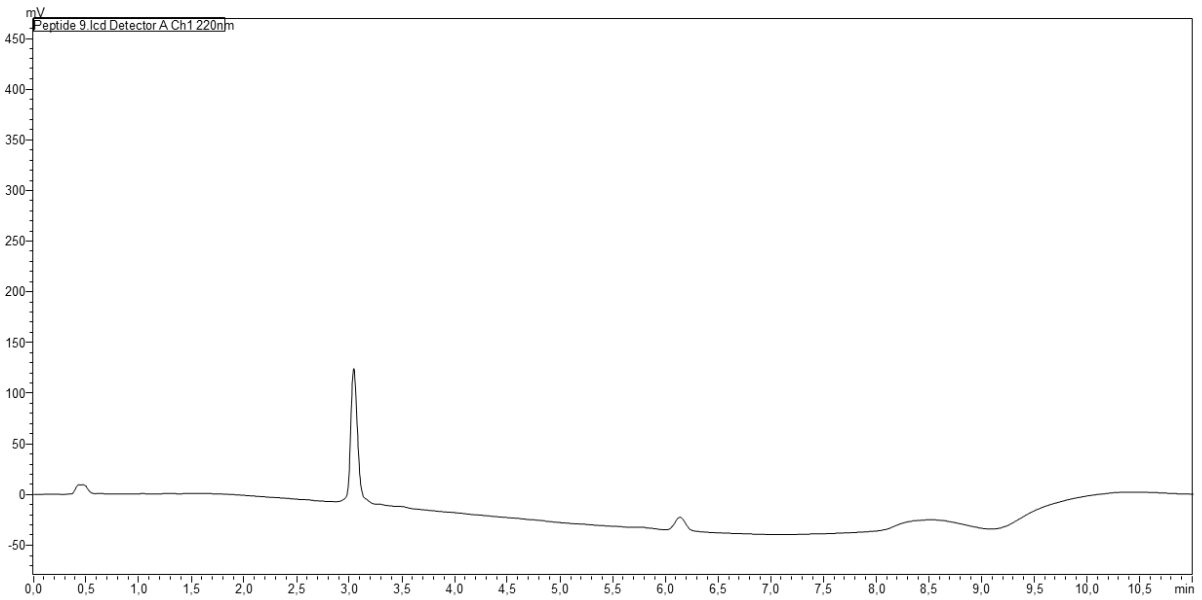

Figure S7. HR-MALDI-MS of Peptide 9 ion  $[M+H]^+$  and analytical HPLC trace at 220 nm.

# Lactoferrin-derived Peptides Active towards Influenza

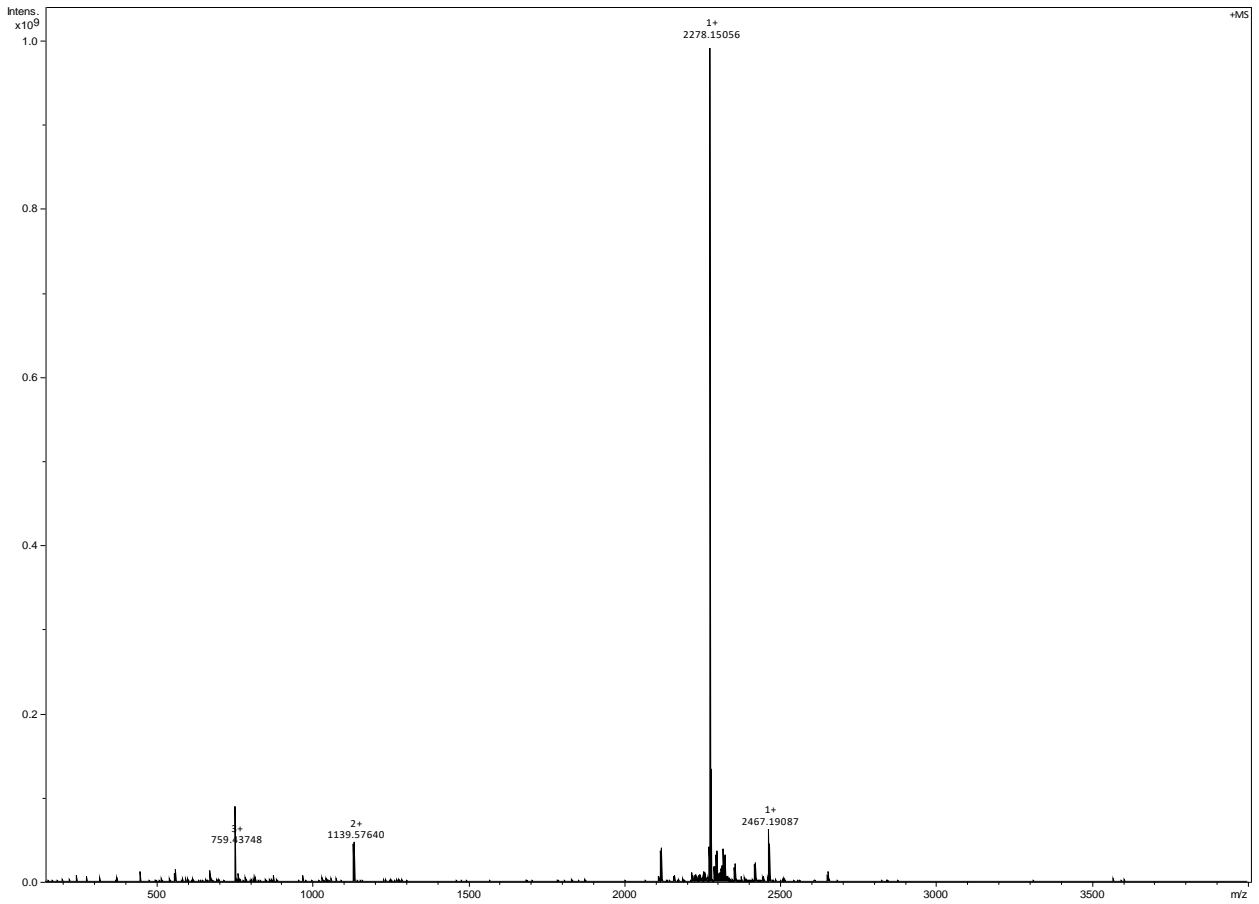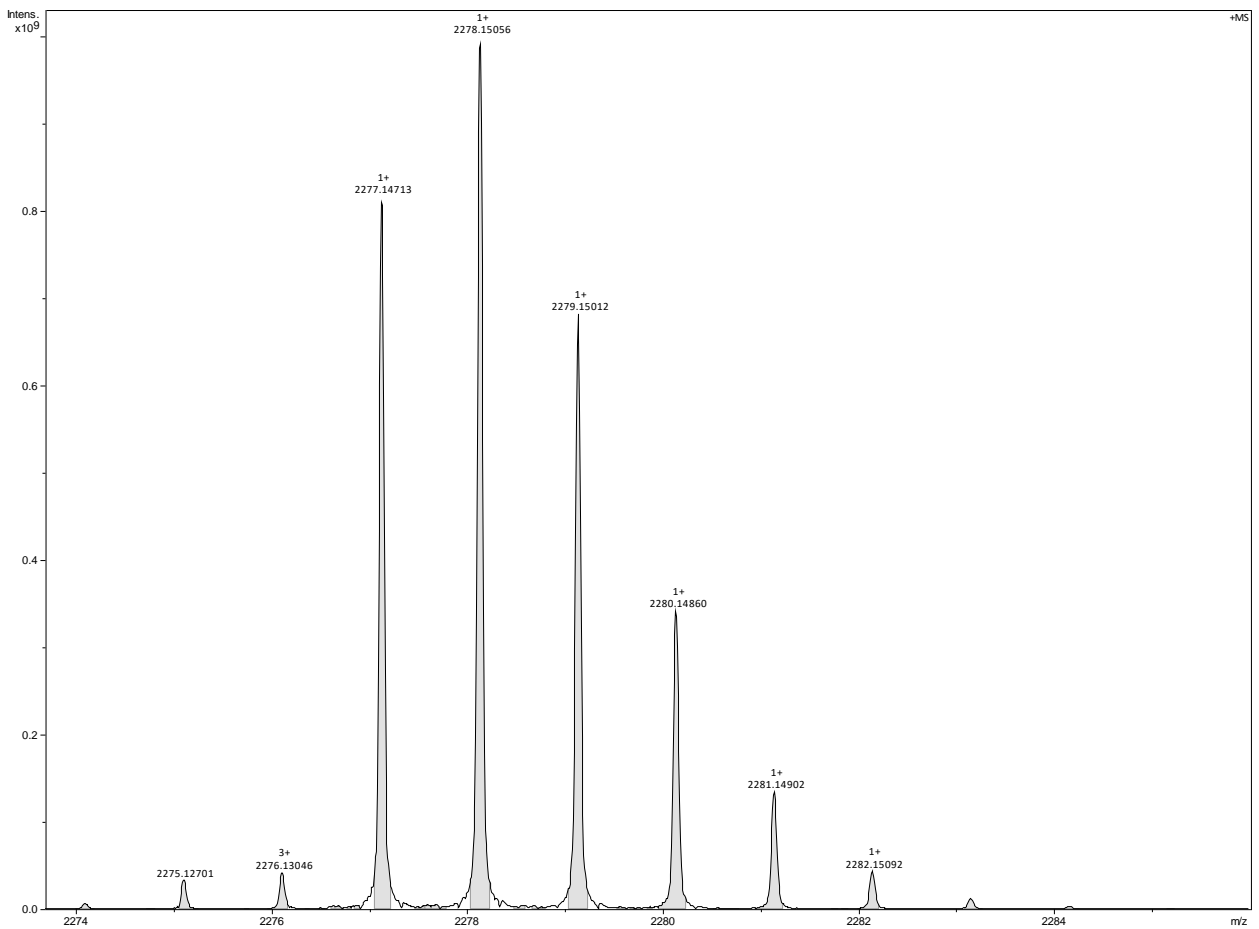

Datafile Name: Peptide 10.lcd

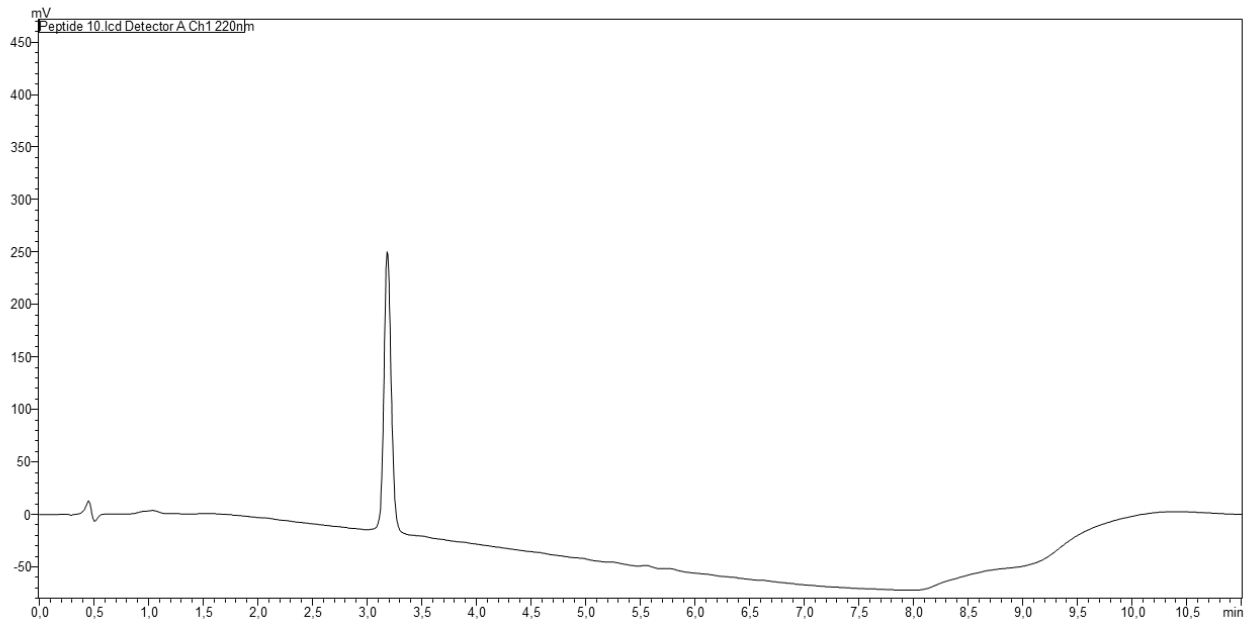

Figure S8. HR-MALDI-MS of Peptide 10 ion  $[M+H]^+$  and analytical HPLC trace at 220 nm.

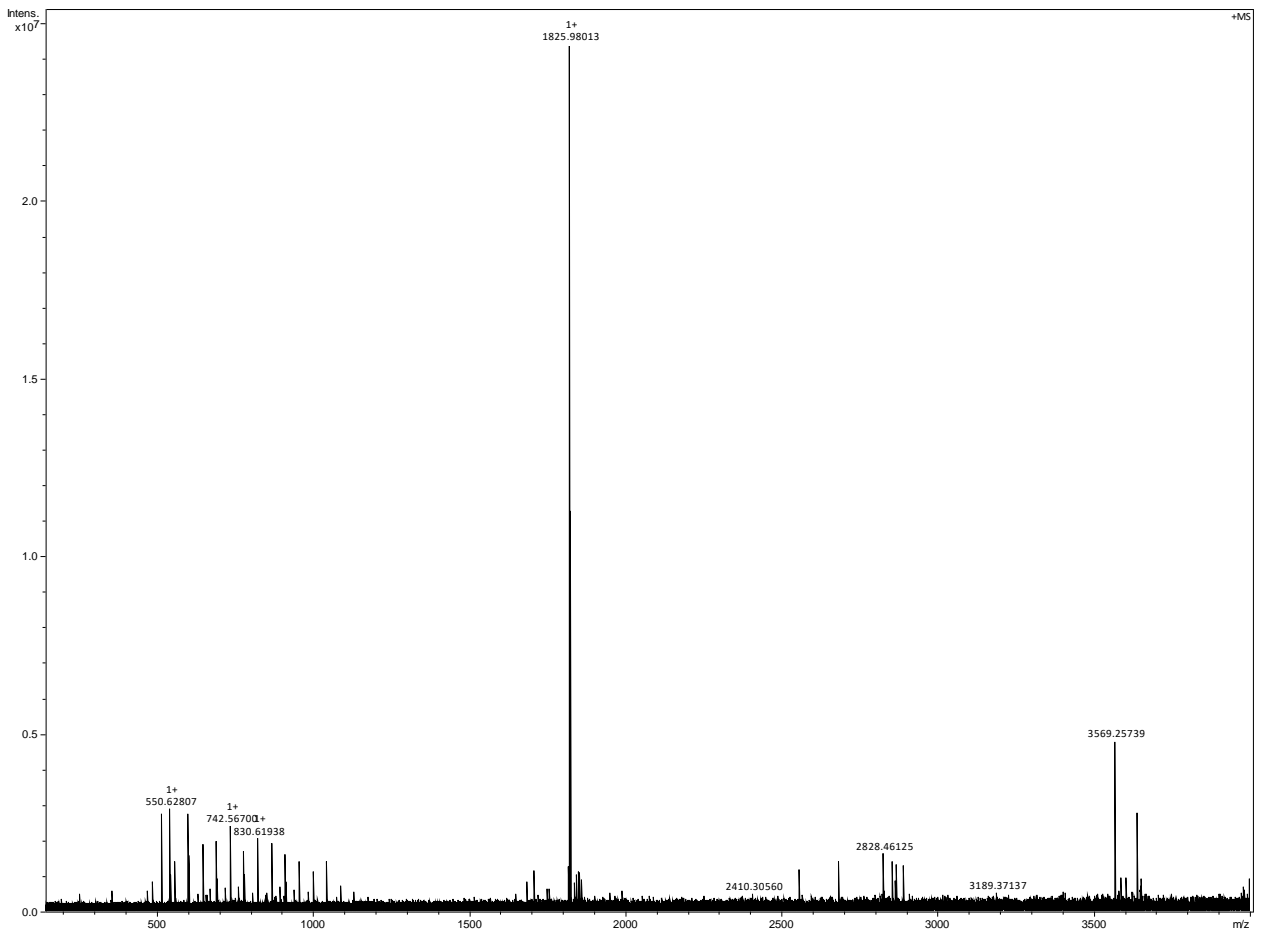

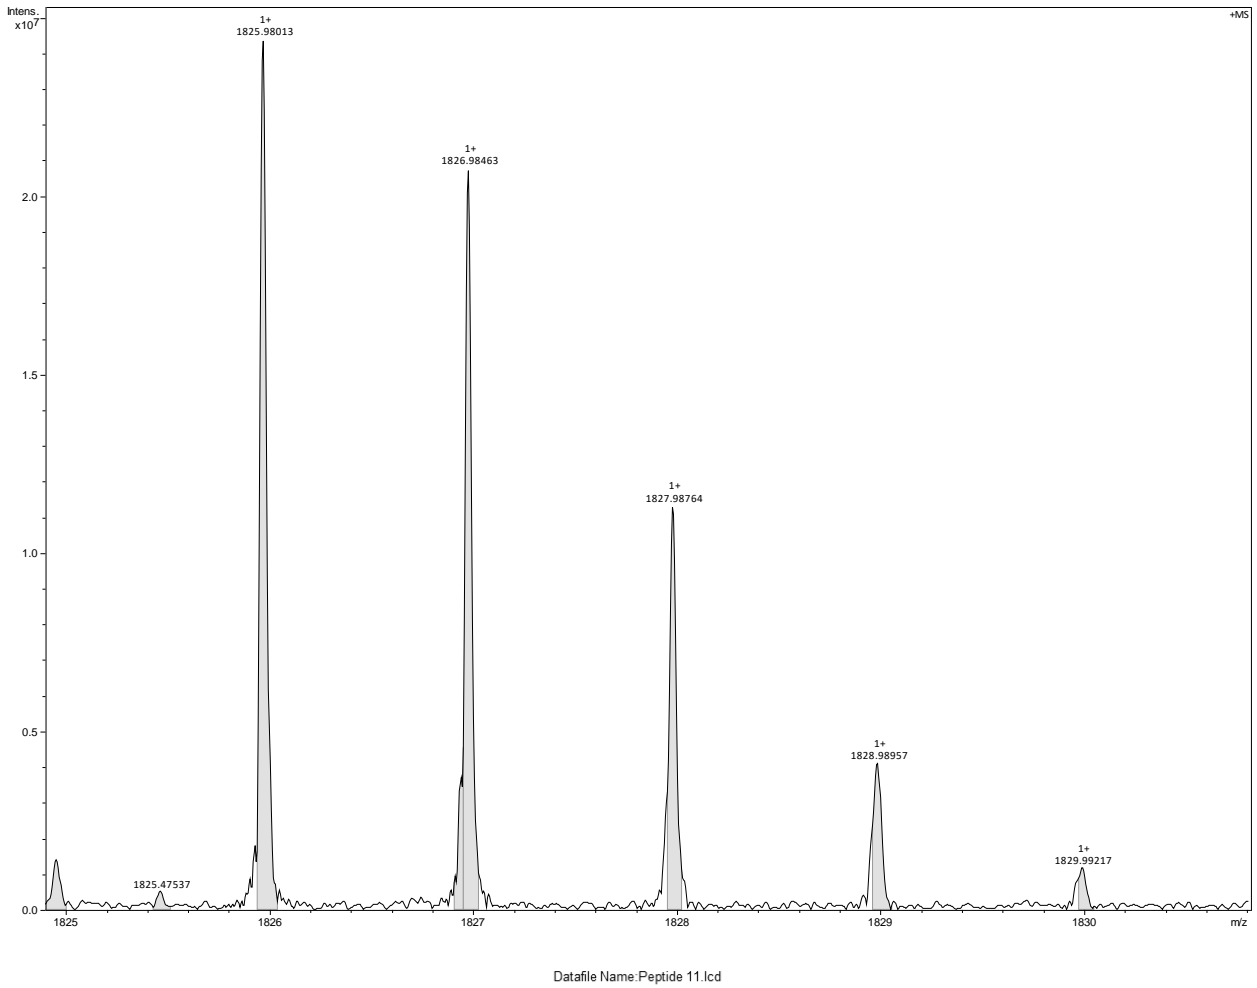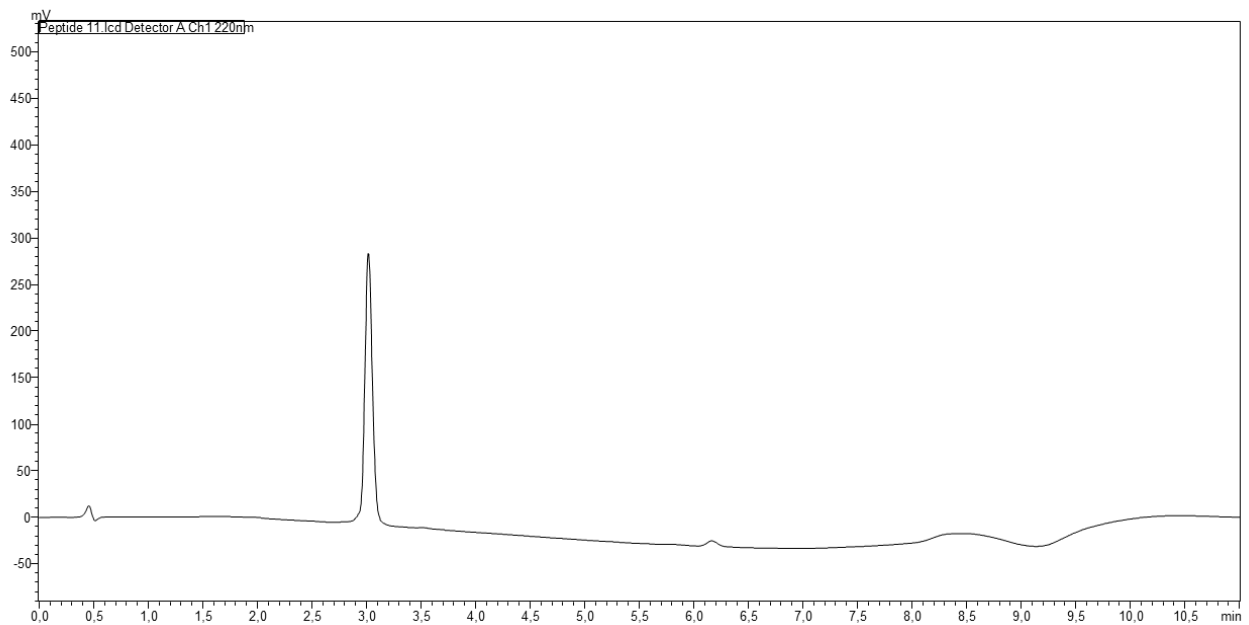

Figure S9. HR-MALDI-MS of Peptide 11 ion  $[M+H]^+$  and analytical HPLC trace at 220 nm.

# Lactoferrin-derived Peptides Active towards Influenza

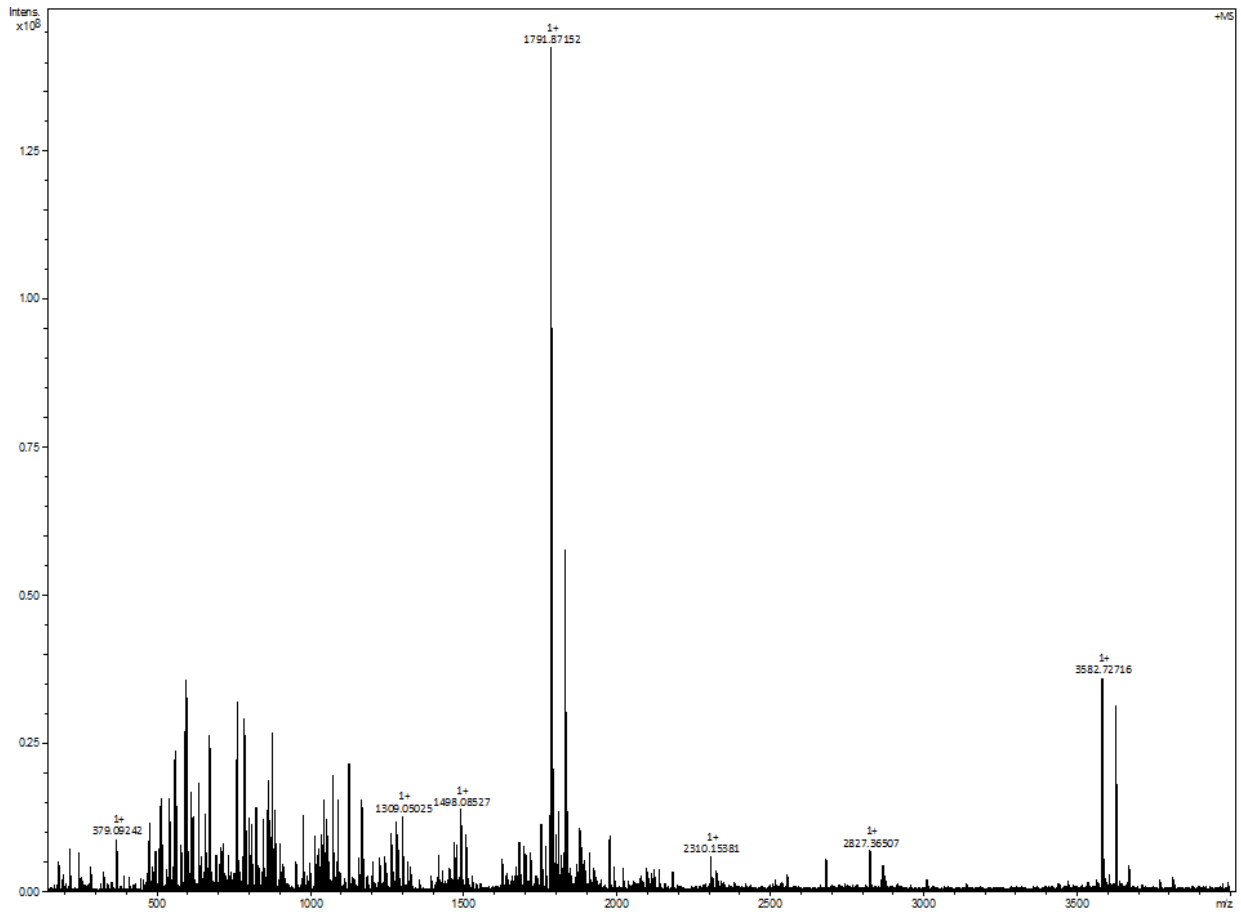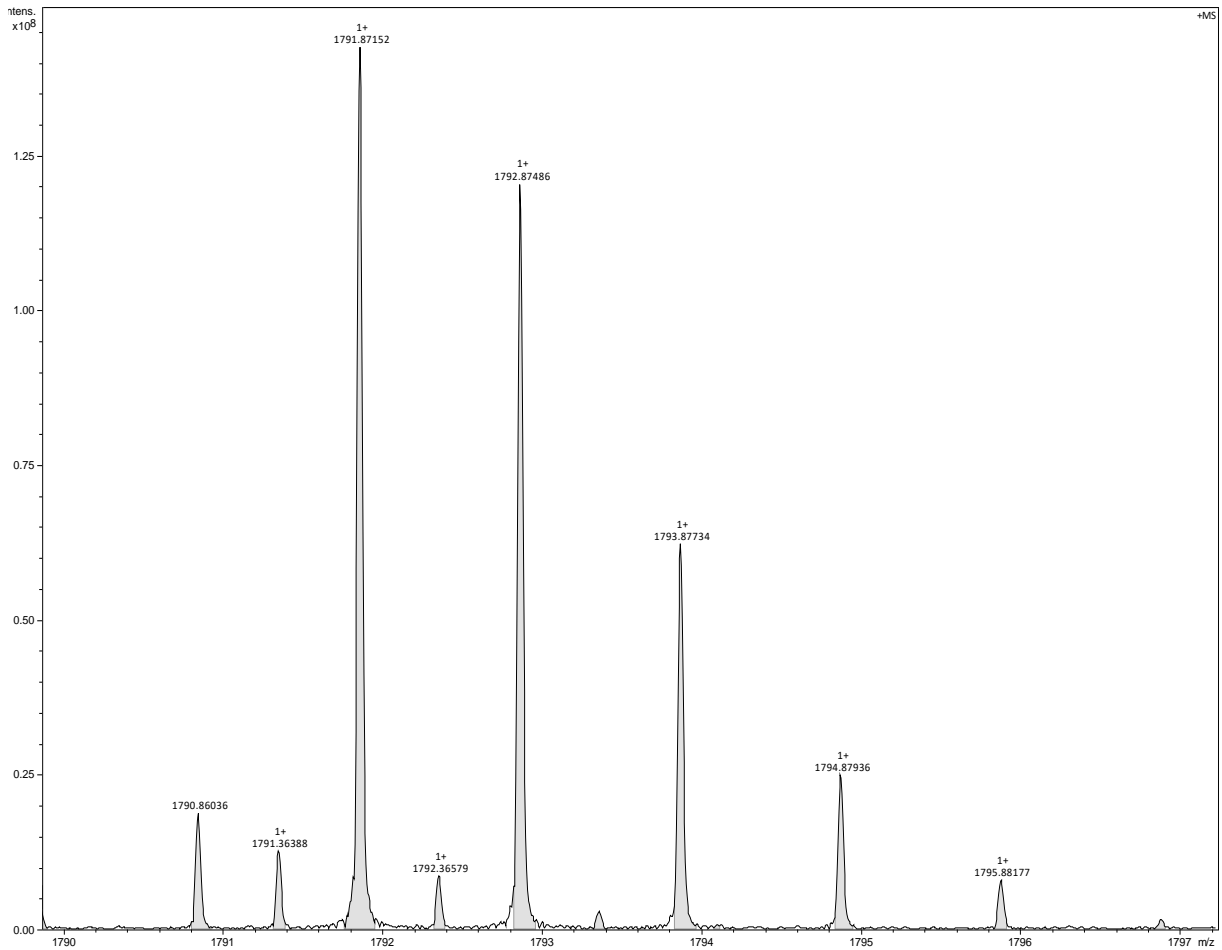



Datafile Name:Peptide 12.lcd

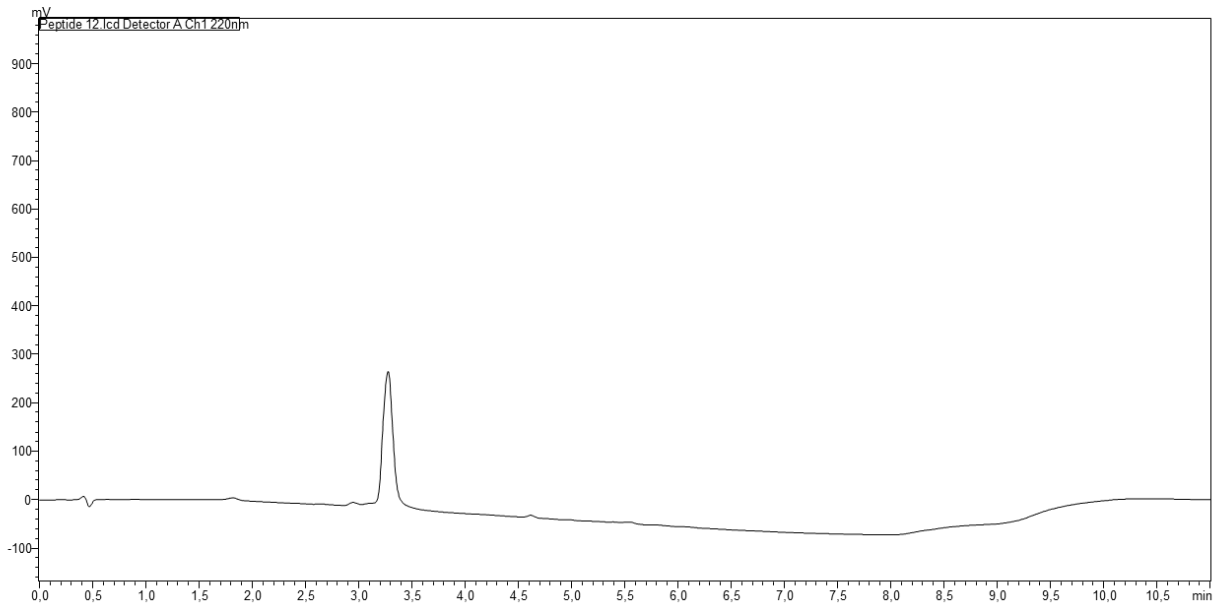

Figure S10. HR-MALDI-MS of Peptide 12 ion  $[M+H]^+$  and analytical HPLC trace at 220 nm.

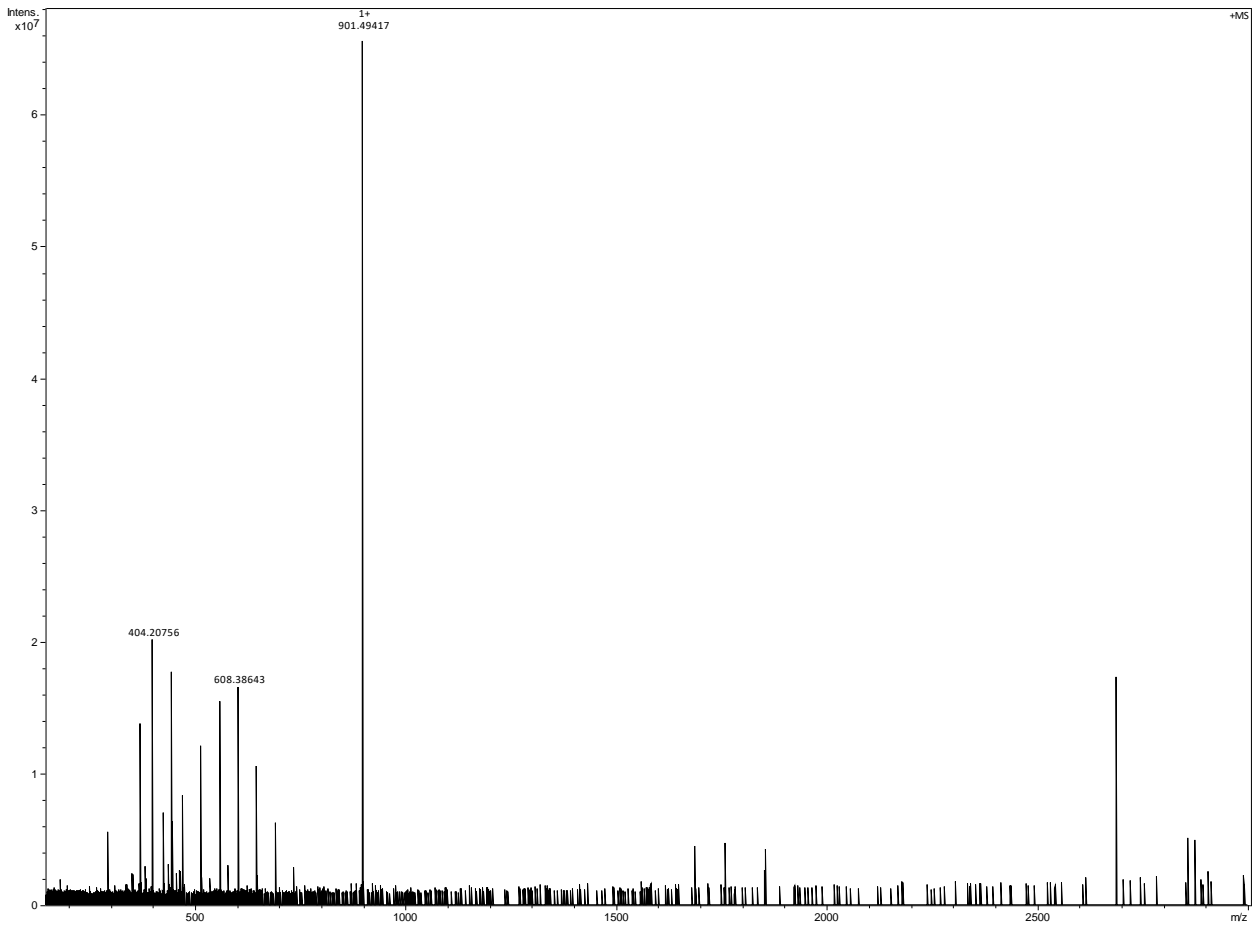

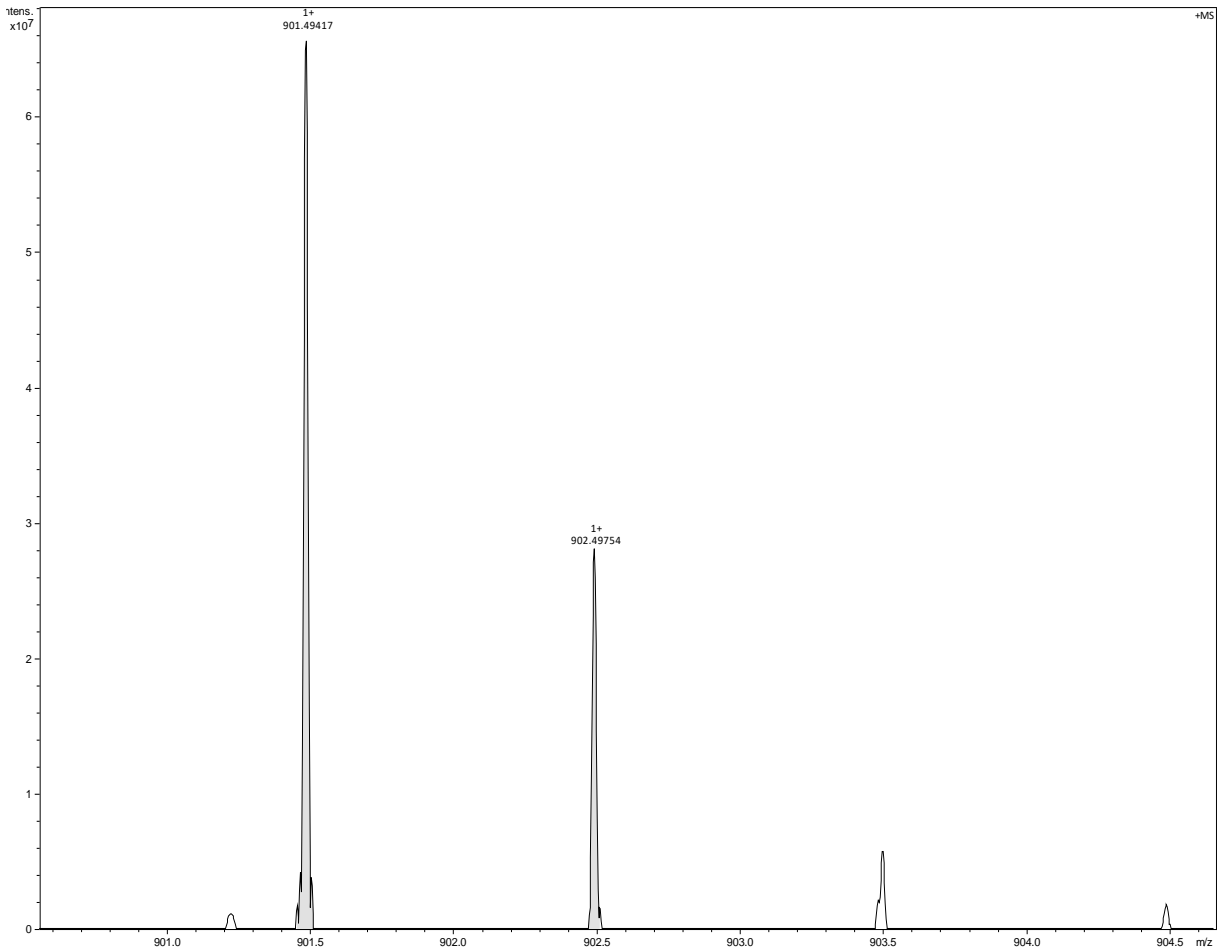

Datafile Name:Peptide 13.lcd

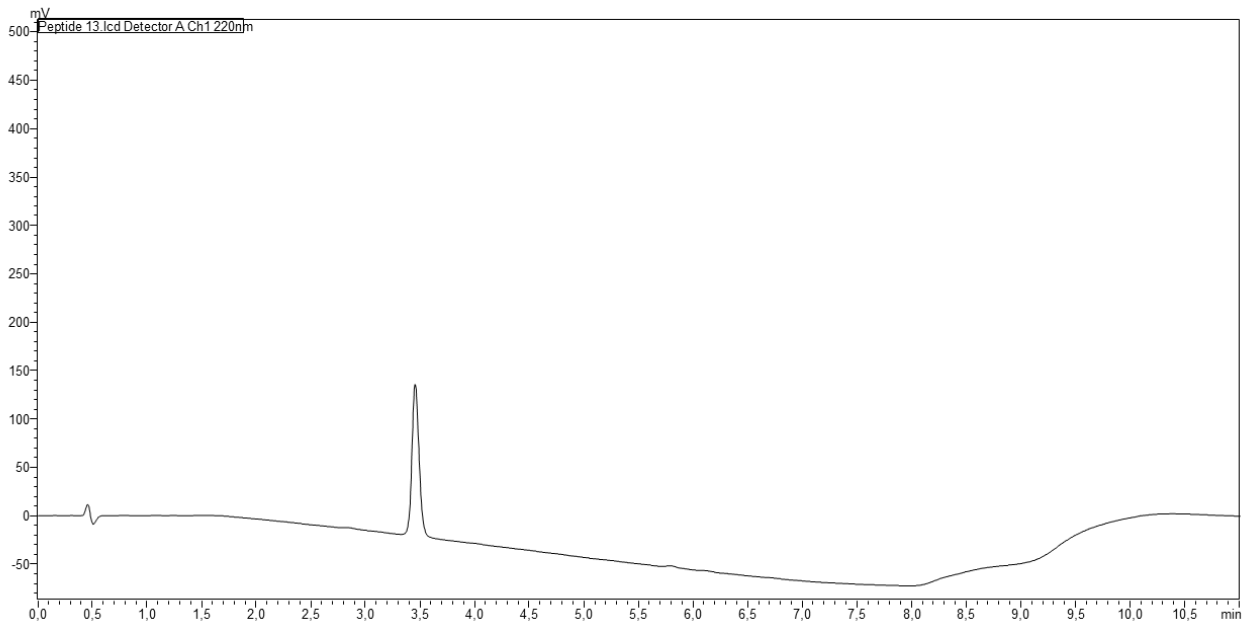

Figure S11. HR-ESI-MS of Peptide 13 ion  $[M+H]^+$  and analytical HPLC trace at 220 nm.

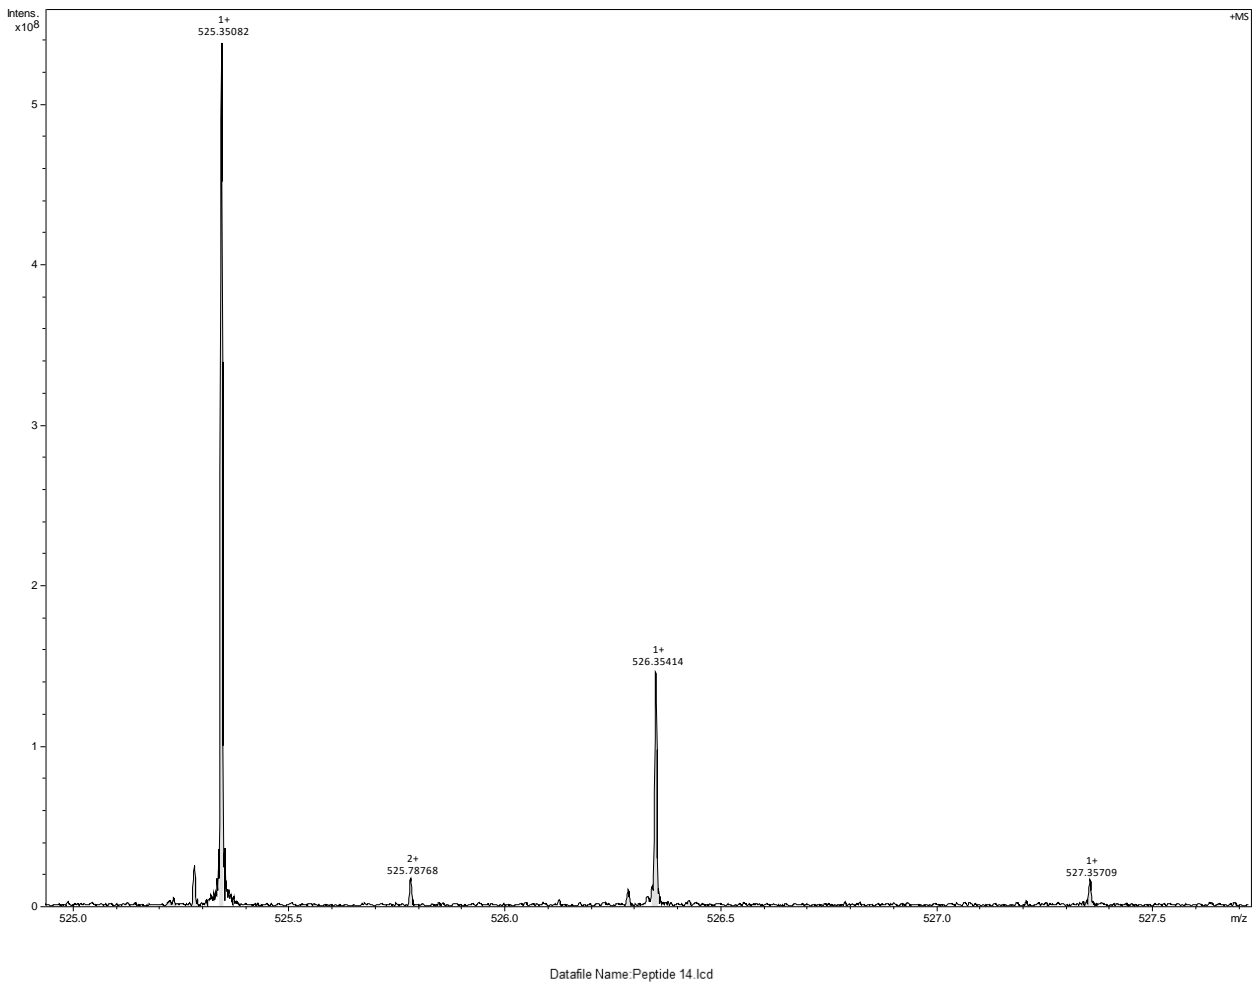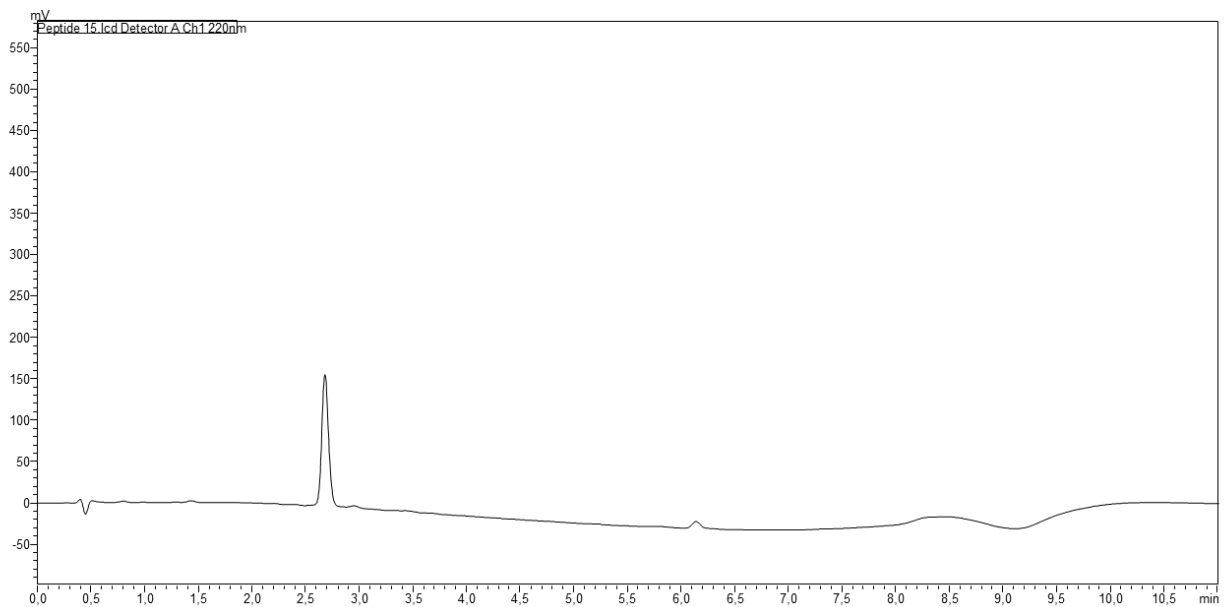

**Figure S12.** HR-ESI-MS of Peptide **14** ion  $[M+H]^+$  and analytical HPLC trace at 220 nm.

# Lactoferrin-derived Peptides Active towards Influenza

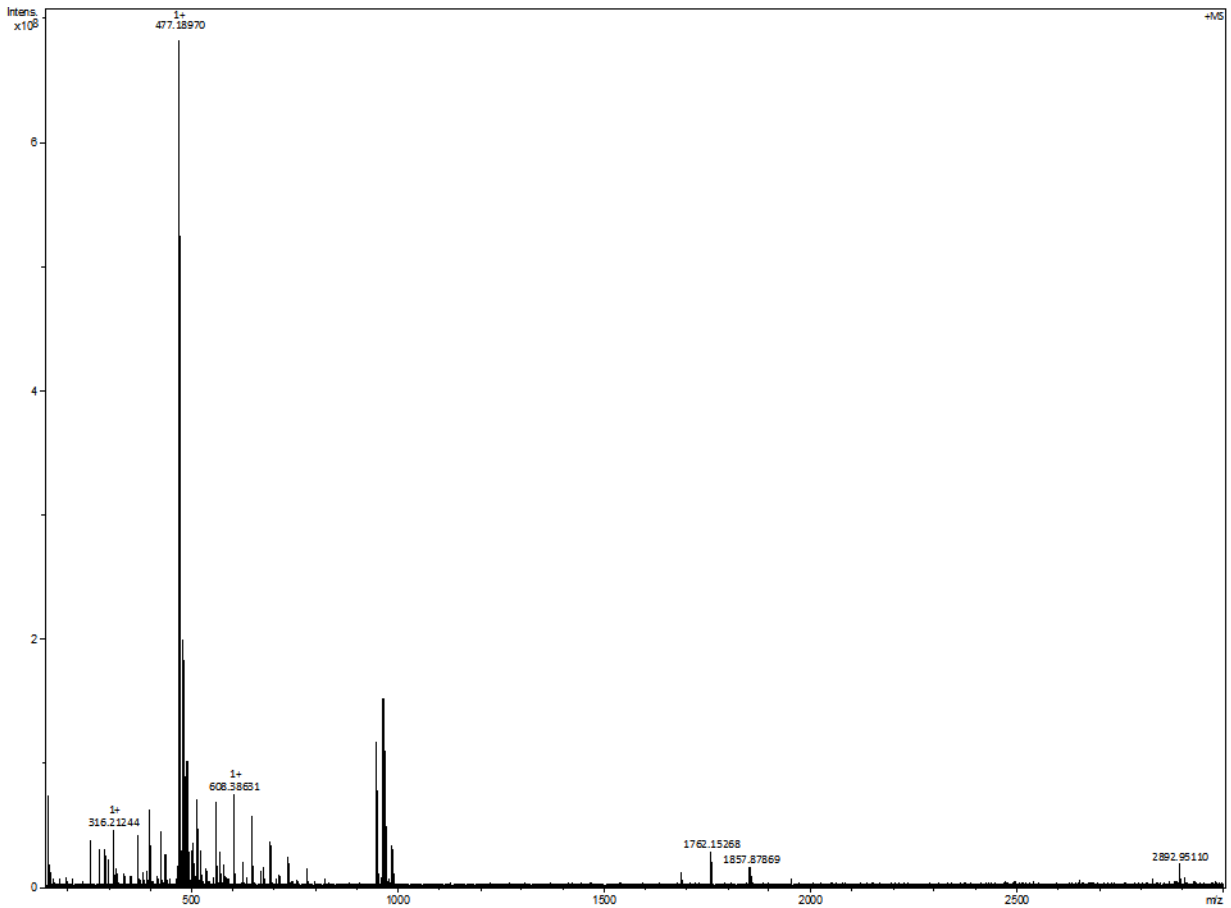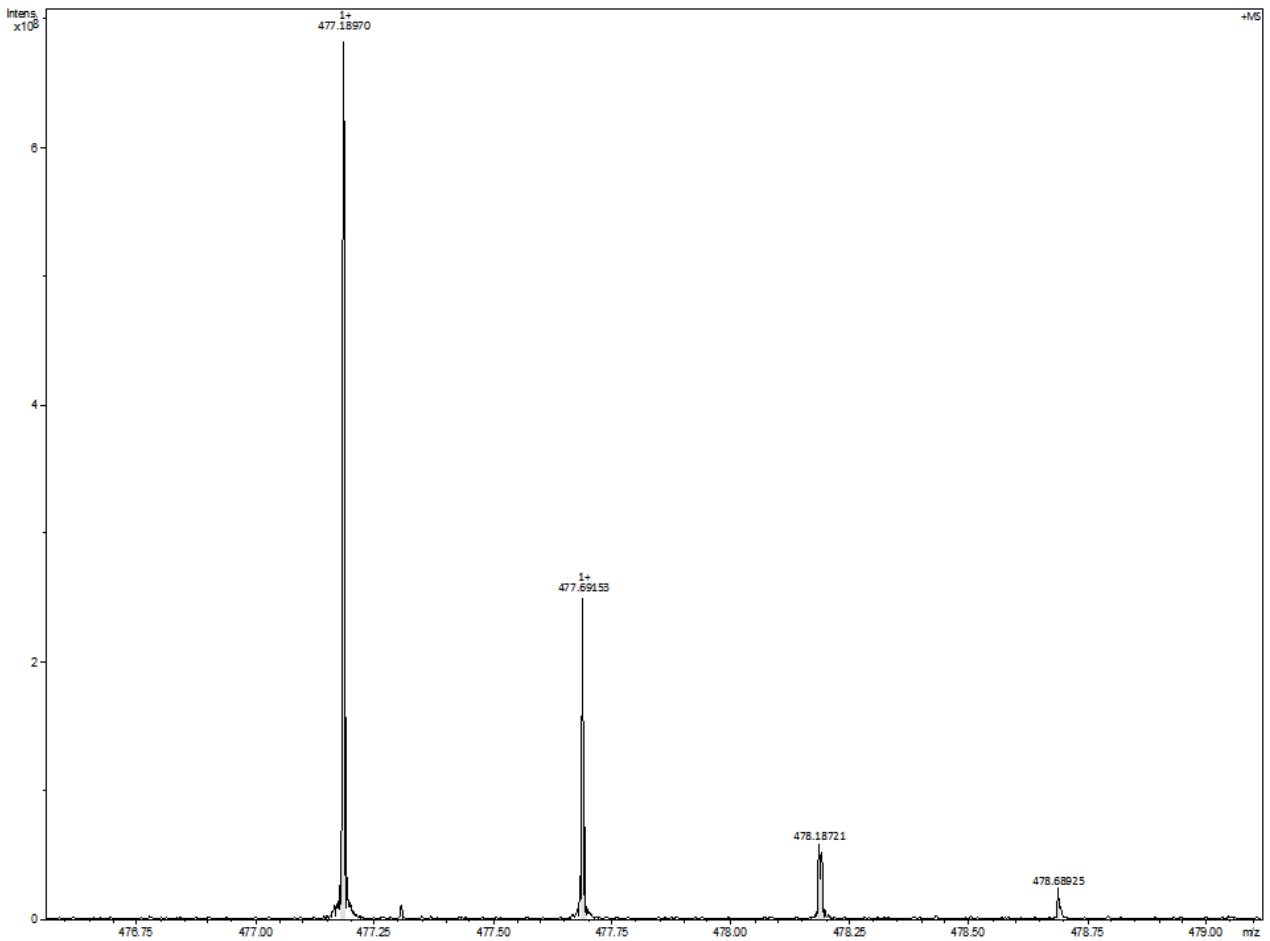

Datafile Name: Peptide 15.lcd

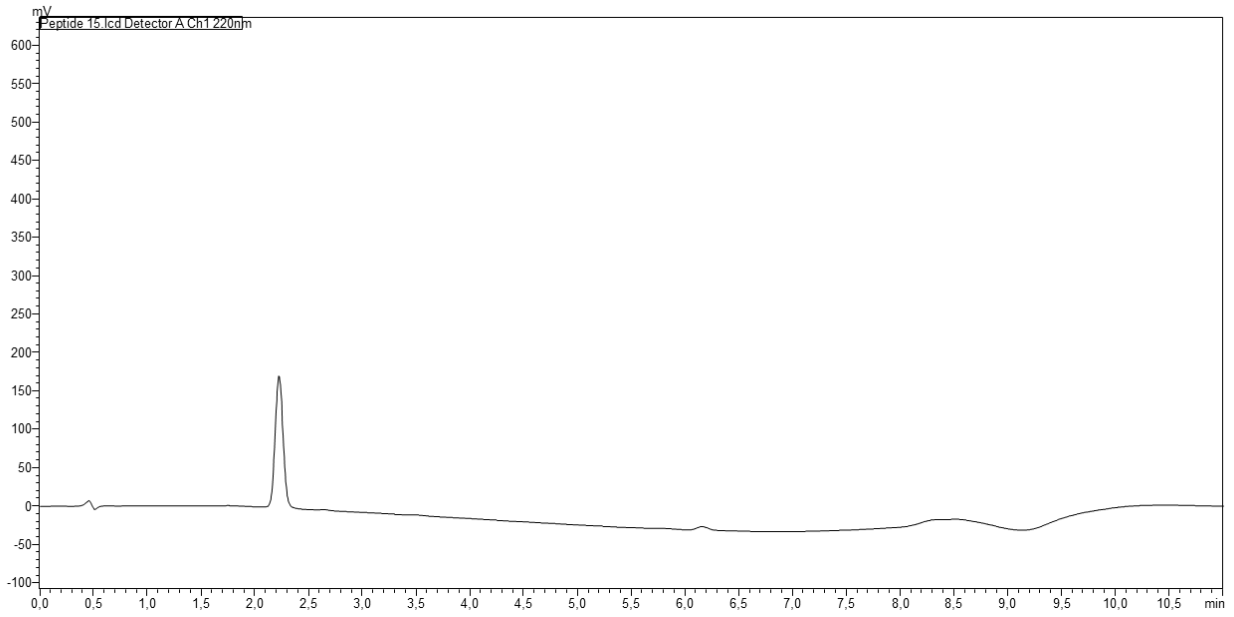

**Figure S13.** HR-ESI-MS of Peptide **15** ion  $[M+H]^+$  and analytical HPLC trace at 220 nm.

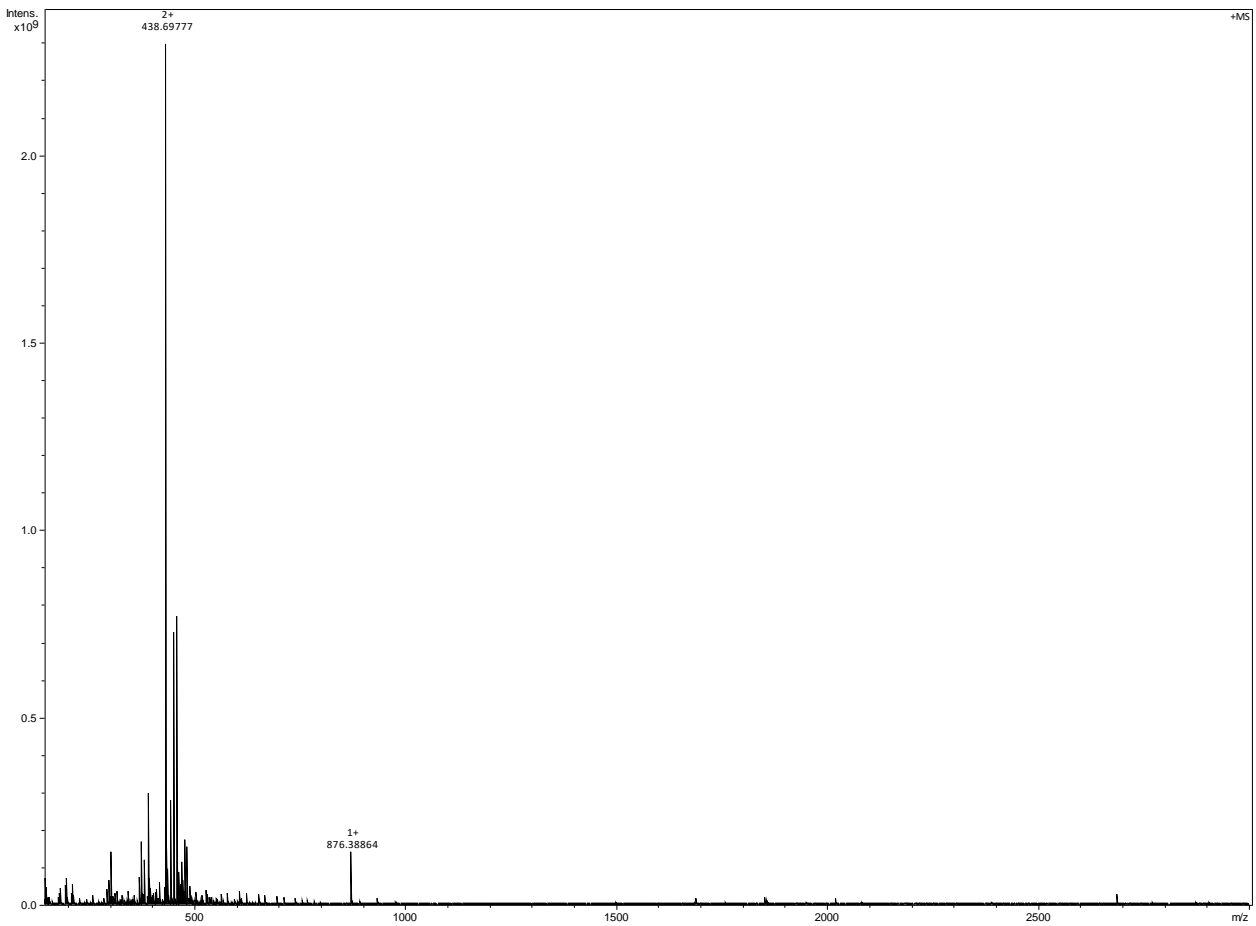

# Lactoferrin-derived Peptides Active towards Influenza

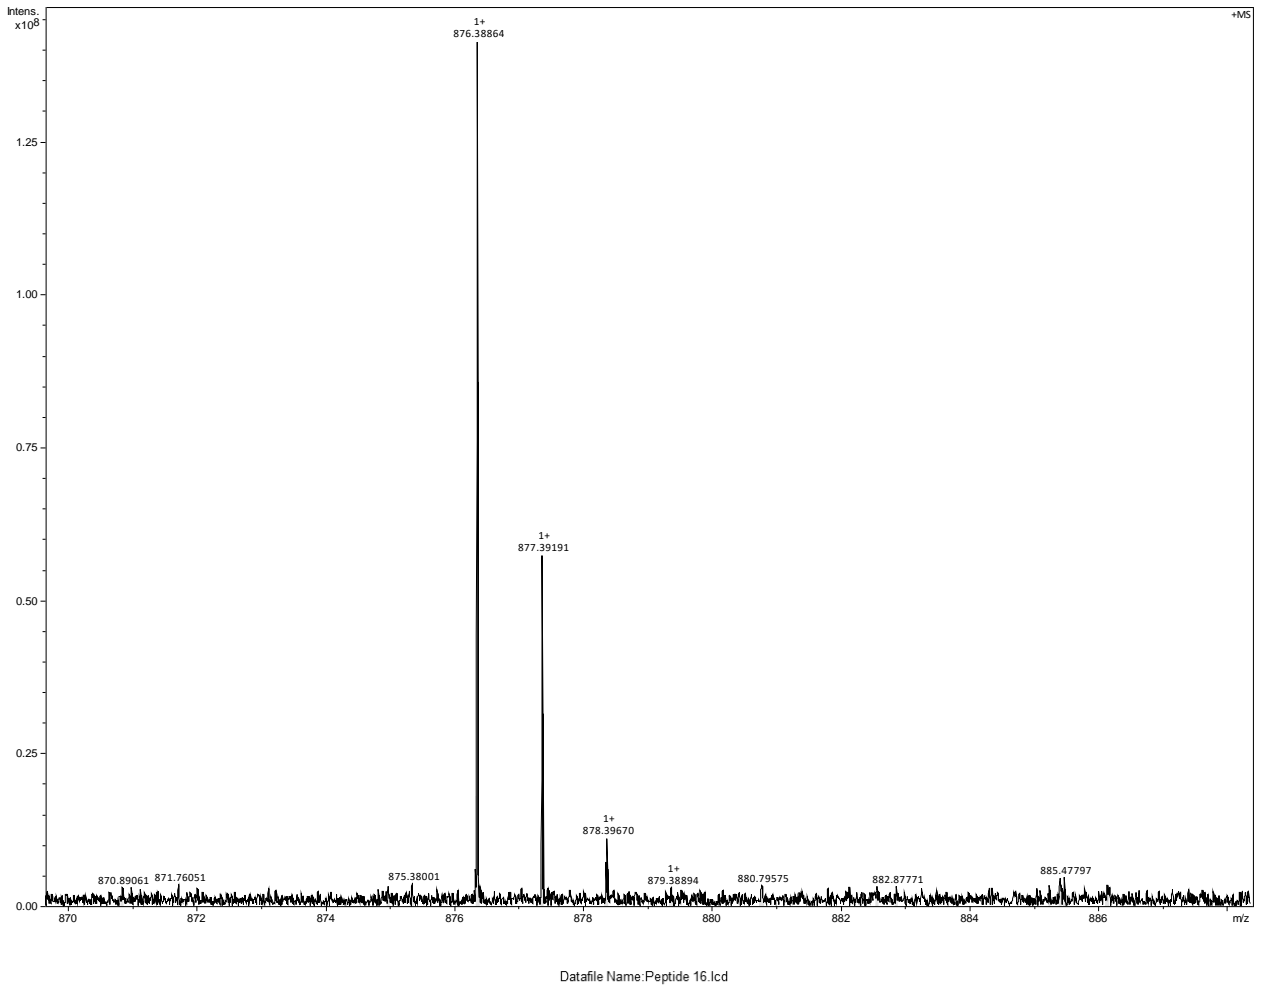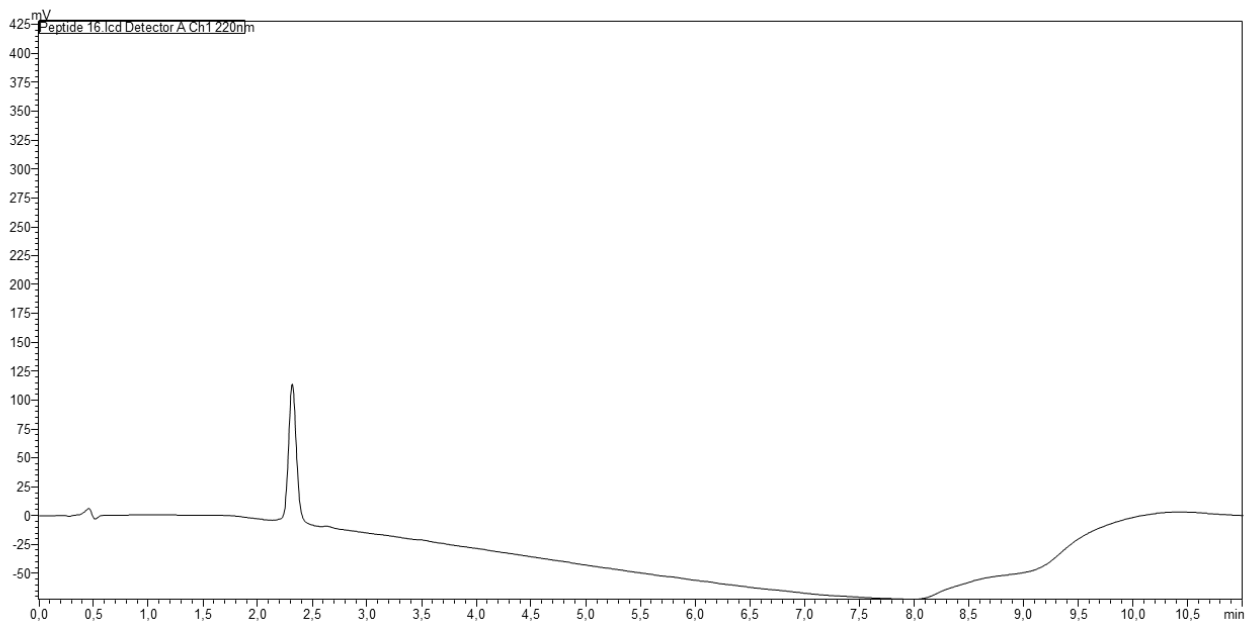

**Figure S14.** HR-ESI-MS of Peptide 16 ion  $[M+H]^+$  and analytical HPLC trace at 220 nm.

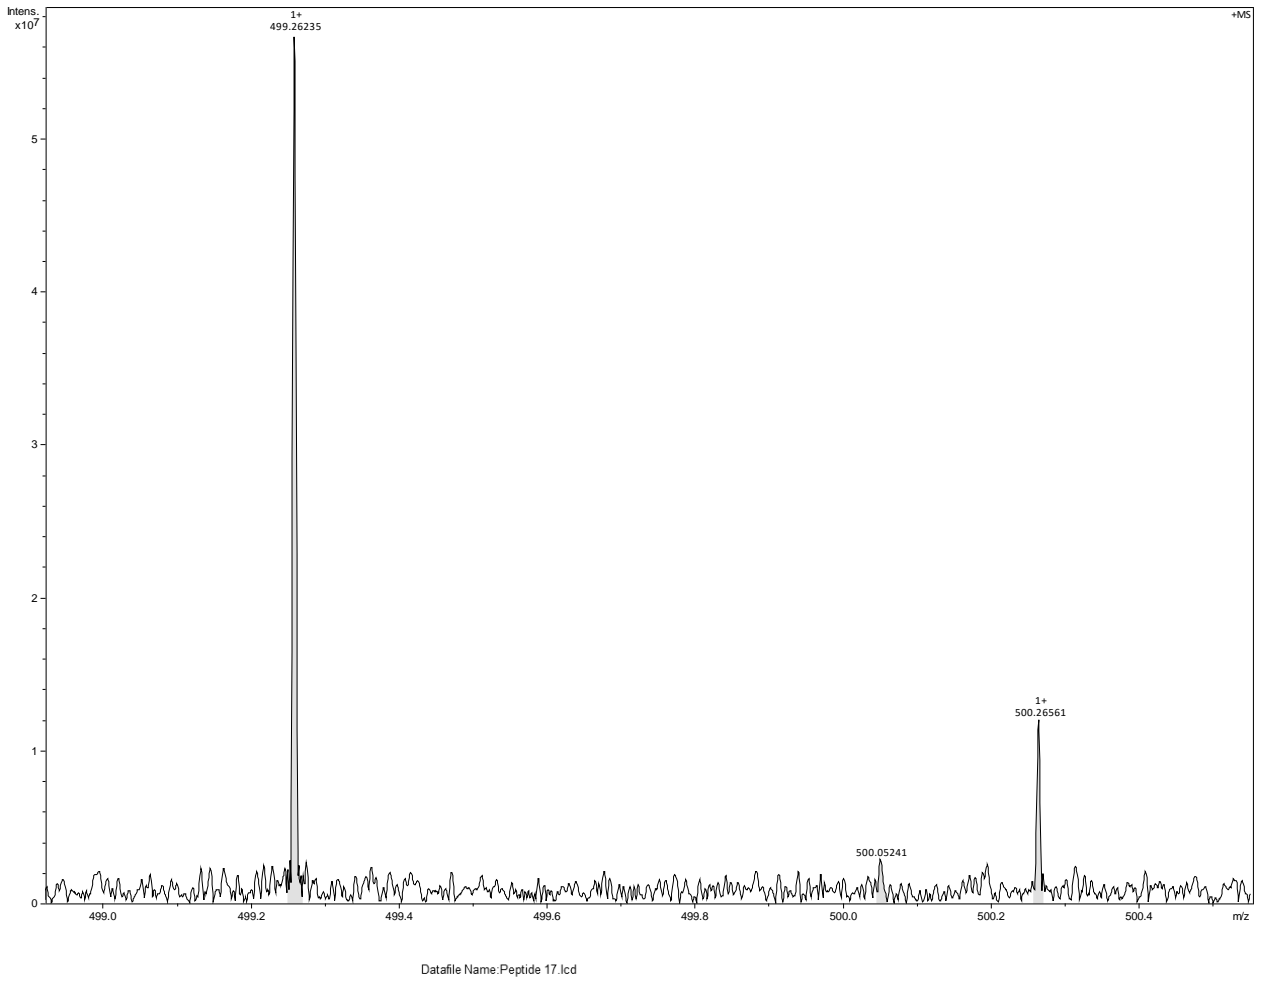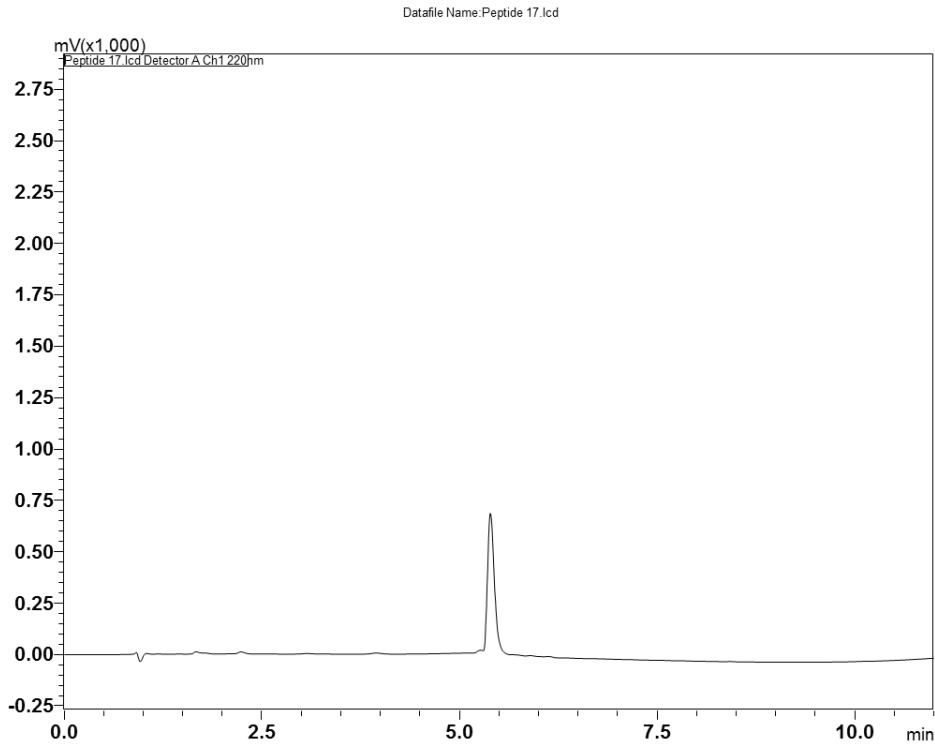

**Figure S15.** HR-ESI-MS of Peptide **17** ion  $[M+H]^+$  and analytical HPLC trace at 220 nm.

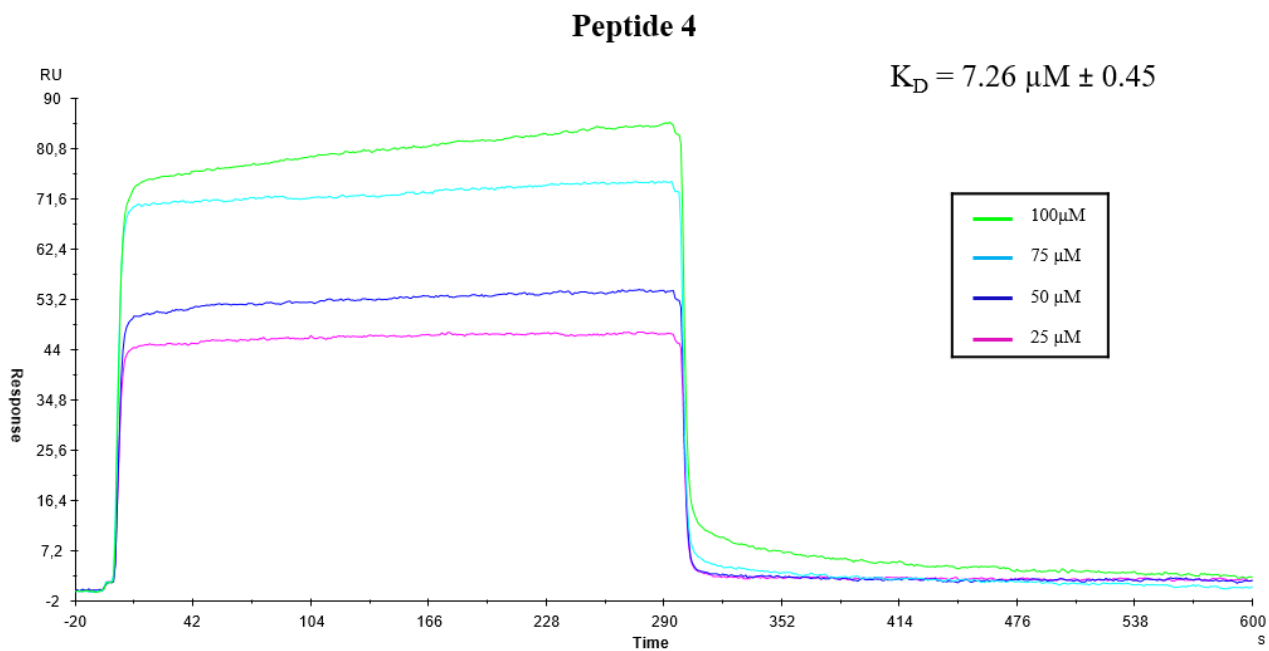

**Figure S16.** Sensorgram obtained from SPR interaction analysis of compound **4** binding to immobilized HA. This compound was injected at four different concentrations (from 25  $\mu\text{M}$  to 100  $\mu\text{M}$ ).



**Table S2.** <sup>1</sup>H chemical shifts (ppm) of **1** in HFA/H<sub>2</sub>O (600 MHz, 300 K).

| residue | NH   | αH   | βH           | γH           | δH                           | εH     | Others                           |
|---------|------|------|--------------|--------------|------------------------------|--------|----------------------------------|
| Ser1    | 7.83 | 4.12 | 3.63         | -            | -                            | -      | -                                |
| Lys2    | 7.45 | 3.96 | 1.47<br>1.43 | 1.12<br>1.07 | 1.34                         | 2.65   | -                                |
| His3    | 7.87 | 4.37 | 2.95<br>2.84 | -            | 6.89<br>(2H)<br>8.08<br>(4H) | -      | -                                |
| Ser4    | 7.80 | 4.22 | 3.66<br>3.54 | -<br>-       | -<br>-                       | -<br>- | -<br>-                           |
| Ser5    | 7.89 | 4.12 | 3.61         |              |                              |        |                                  |
| Leu6    | 7.35 | 4.06 | 1.29         | 1.22         | 0.61<br>0.51                 | -<br>- | -<br>-                           |
| Asp7    | 7.59 | 4.14 | 2.43         | -            | -                            | -      | -                                |
| Cys8    | 7.40 | 4.06 | 2.69<br>2.65 | -            | -                            | -      | -                                |
| Val9    | 7.25 | 3.76 | 1.81         | 0.61         | -                            | -      | -                                |
| Leu10   | 7.31 | 3.99 | 1.30         | 1.22         | 0.53<br>0.51                 | -      | -                                |
| Arg11   | 7.21 | 4.33 | 1.53<br>1.44 | 1.54         | 2.85<br>2.77                 |        | 6.609<br>(NHE)<br>7.526<br>(NHZ) |
| Pro12   | -    | 4.04 | 1.93<br>1.71 | 1.61         | 3.39<br>3.25                 | -      | -                                |

**Table S3.** <sup>1</sup>H chemical shifts (ppm) of **13** in HFA/H<sub>2</sub>O (600 MHz, 300 K).

| residue | NH   | αH   | βH           | γH   | δH           | εH | Others    |
|---------|------|------|--------------|------|--------------|----|-----------|
| Ser1    | 7.48 | 4.28 | 3.78         | -    | -            | -  |           |
| Leu2    | 8.11 | 4.06 | 1.37         | 1.27 | 0.60<br>0.64 |    |           |
| Asp3    | 7.98 | 4.19 | 2.42         |      |              |    |           |
| Cys4    | 7.54 | 4.18 | 2.69         |      |              |    |           |
| Val5    | 7.41 | 3.82 | 1.87         | 0.66 |              |    |           |
| Leu6    | 7.37 | 4.06 | 1.28         | 1.37 | 0.57<br>0.61 |    |           |
| Arg7    | 7.37 | 4.37 | 1.47<br>1.57 | 1.36 | 2.89         | -  | 6.71(NHE) |
| Pro8    | -    | 4.08 | 1.76<br>1.99 | 1.67 | 3.31<br>3.44 | -  | -         |

**Table S4.** <sup>1</sup>H chemical shifts (ppm) of **14** in [D<sub>6</sub>]DMSO (600 MHz, 300 K).

| residue | NH   | αH   | βH           | γH   | δH           | εH | Others       |
|---------|------|------|--------------|------|--------------|----|--------------|
| Acetyl  | -    | -    | -            | -    | -            | -  | 1.88         |
| Val1    | 7.94 | 4.12 | 1.97         | 0.84 | -            | -  | -            |
| Leu2    | 8.01 | 4.31 | 1.48<br>1.59 | 1.45 | 0.82<br>0.87 | -  | -            |
| Arg3    | 7.91 | 4.49 | 1.55<br>1.77 | 1.53 | 3.09         | -  | 7.83         |
| Pro4    | -    | 4.20 | 1.92<br>2.03 | 1.79 | 3.59<br>3.73 | -  | 6.88<br>7.32 |

**Table S5.**  $^1\text{H}$  chemical shifts (ppm) of **15** in  $[\text{D}_6]\text{DMSO}$  (600 MHz, 300 K).

| residue | NH   | $\alpha\text{H}$ | $\beta\text{H}$ | $\gamma\text{H}$ | $\delta\text{H}$ | $\epsilon\text{H}$ | Others |
|---------|------|------------------|-----------------|------------------|------------------|--------------------|--------|
| Acetyl  | -    | -                | -               | -                | -                | -                  | 1.88   |
| Ser1    | 7.95 | 4.30             | 3.54<br>3.57    |                  |                  |                    |        |
| Leu2    | 8.03 | 4.27             | 1.62            | 1.49             | 0.85<br>0.88     |                    |        |
| Asp3    | 8.20 | 4.52             | 2.53<br>2.77    |                  |                  |                    |        |
| Cys4    | 7.75 | 4.28             | 2.76<br>2.83    |                  |                  |                    | 7.24   |

**Table S6.**  $^1\text{H}$  chemical shifts (ppm) of **17** in  $[\text{D}_6]\text{DMSO}$  (600 MHz, 300 K).

| residue | NH   | $\alpha\text{H}$ | $\beta\text{H}$ | $\gamma\text{H}$ | $\delta\text{H}$ | $\epsilon\text{H}$ | Others |
|---------|------|------------------|-----------------|------------------|------------------|--------------------|--------|
| Acetyl  | -    | -                | -               | -                | -                | -                  | 1.87   |
| Ser1    | 8.12 | 4.33             | 3.62<br>3.57    | -                | -                | -                  | -      |
| Lys2    | 8.34 | 4.17             | 1.65<br>1.51    | 1.27             | 1.51             | 2.73               | -      |
| His3    | 8.06 | 4.41             | 2.96<br>2.85    | -                | 6.82 (2H)        | 7.51 (4H)          | -      |
| Ser4    | 7.86 | 4.14             | 3.63            | -                | -                | -                  | -      |

**Table S7.** Mean values of  $\phi$ ,  $\psi$  and  $\chi_1$  angles and  $\alpha\text{C}$  distances relative to the most representative conformers of **1**.

| peptide  | sequence       | i+1    |        |          | i+2    |        |          | $\alpha\text{C}$ distance |          |
|----------|----------------|--------|--------|----------|--------|--------|----------|---------------------------|----------|
|          |                | $\phi$ | $\psi$ | $\chi_1$ | $\phi$ | $\psi$ | $\chi_1$ | i to i+2                  | i to i+3 |
| <b>1</b> | Lys2- Ser5     | -52.9  | -29.7  | -83.7    | 138.1  | 42.8   | 140.3    | -                         | 4.8      |
|          | Ser4-Asp7      | -76.3  | 166.1  | 124.7    | 69.9   | 8.5    | -67.0    | -                         | 6.2      |
|          | Leu6-Val9      | 108.6  | 75.2   | -95.6    | 64.6   | 27.2   | 120.6    | -                         | 5.7      |
|          | Asp7-<br>Leu10 | 64.6   | 27.2   | 120.6    | 71.1   | 42.9   | 164.2    | -                         | 5.3      |
|          | Val9-Arg11     | -76.1  | 91.0   | 147.5    | -      | -      | -        | 5.9                       | -        |

**Table S8.** Mean values of  $\phi$ ,  $\psi$  and  $\chi_1$  angles and  $\alpha\text{C}$  distances relative to the most representative conformers of **13**.

| peptide   | sequence  | i+1    |        |          | i+2    |        |          | $\alpha\text{C}$ distance<br>i to i+3 |
|-----------|-----------|--------|--------|----------|--------|--------|----------|---------------------------------------|
|           |           | $\phi$ | $\psi$ | $\chi_1$ | $\phi$ | $\psi$ | $\chi_1$ |                                       |
| <b>13</b> | Cys4-Arg7 | -51.9  | -29.7  | -164.4   | -152.9 | 20.8   | -116.0   | 4.4                                   |

**Table S9.**  $^1\text{H}$  chemical shifts (ppm) of **4** in HFA/H<sub>2</sub>O (600 MHz, 300 K).

| residue | NH   | $\alpha\text{H}$ | $\beta\text{H}$ | $\gamma\text{H}$ | $\delta\text{H}$ | $\epsilon\text{H}$ | Others                               |
|---------|------|------------------|-----------------|------------------|------------------|--------------------|--------------------------------------|
| Lys1    |      | 3.74             | 1.67            | 2.76             | 1.21             |                    |                                      |
| Ala2    | 8.22 | 4.01             | 1.15            |                  |                  |                    |                                      |
| Asn3    | 7.89 | 4.34             | 2.53            |                  | 6.34<br>6.98     |                    |                                      |
| Glu4    | 8.01 | 3.95             | 1.71<br>1.79    | 2.05             |                  |                    |                                      |
| Gly5    | 7.92 | 3.65             |                 |                  |                  |                    |                                      |
| Leu6    | 7.45 | 4.04             | 1.37            | 1.30             | 0.60             |                    |                                      |
| Thr7    | 7.54 | 3.95             |                 | 0.90             |                  |                    |                                      |
| Trp8    | 7.70 | 4.22             | 3.05            |                  |                  |                    | 6.85<br>7.17<br>7.29<br>6.93<br>9.35 |
| Asn9    | 7.63 | 4.10             | 2.31<br>2.36    |                  | 6.27<br>6.91     |                    |                                      |
| Ser10   | 7.63 | 4.05             | 3.64<br>3.70    |                  |                  |                    |                                      |
| Leu11   | 7.45 | 4.56             | 1.42            | 1.28             | 0.58             |                    |                                      |
| Lys12   | 7.38 | 3.89             | 1.41            | 1.06             | 1.30             | 2.66               |                                      |
| Asp13   | 7.66 | 4.41             | 2.45<br>2.53    |                  |                  |                    |                                      |
| Lys14   | 7.25 | 3.92             | 1.49<br>1.61    | 1.14             | 1.40             | 2.71               |                                      |

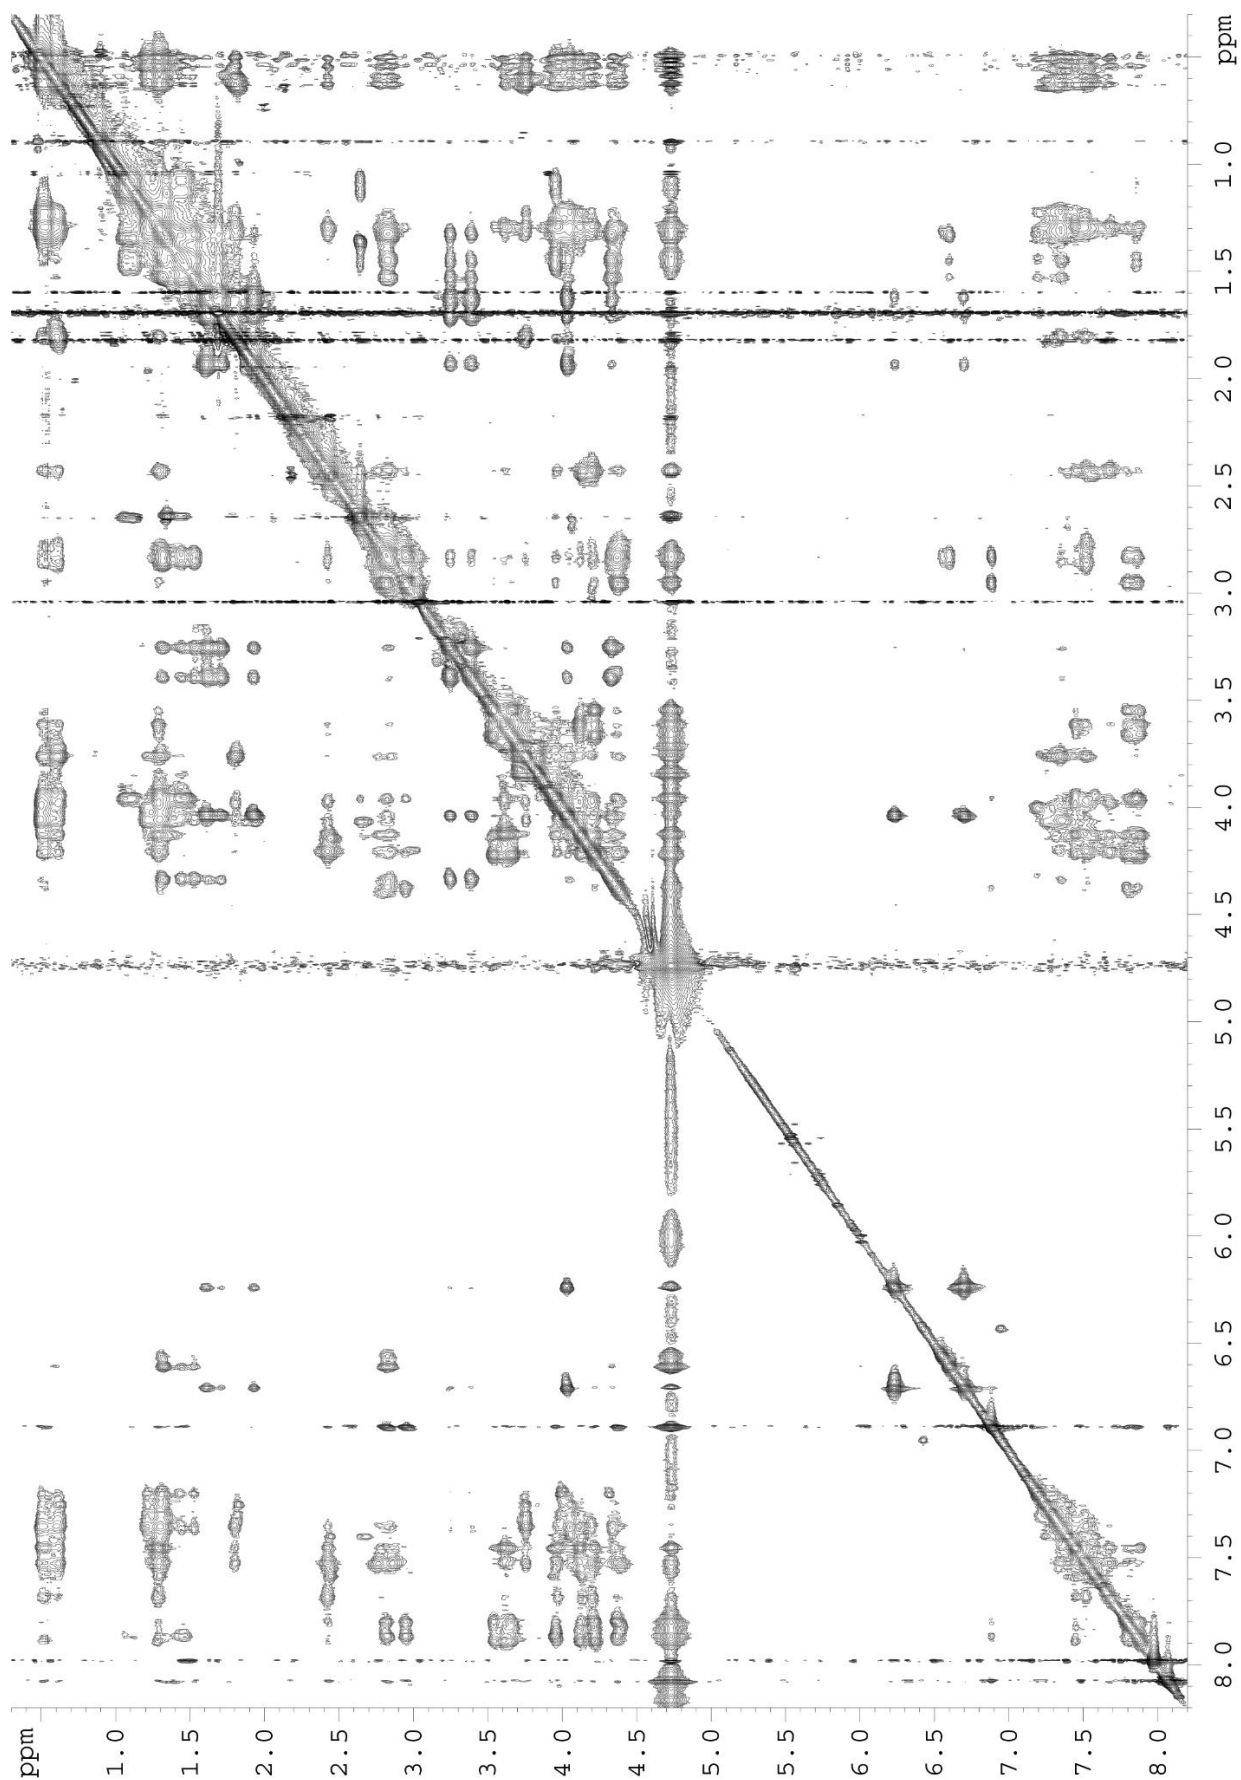

**Figure S17.** 2D-NOESY spectrum of **1** HFA/H<sub>2</sub>O solution (600 MHz, 300 K,  $t_{\text{mix}} = 400$  ms).

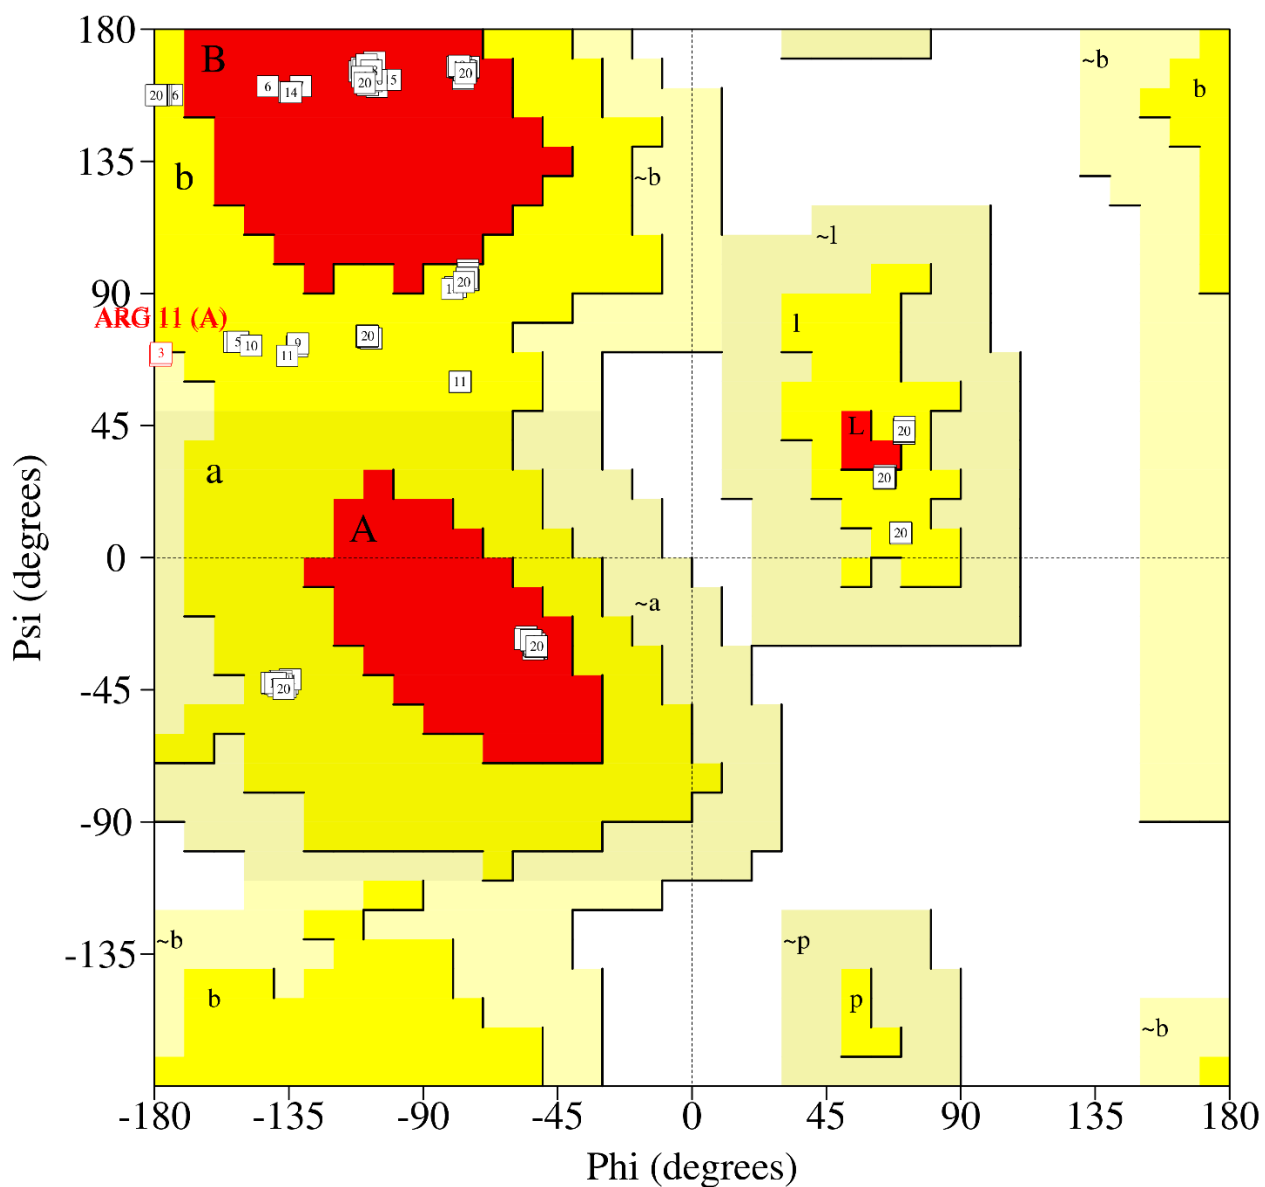

Figure S18. Ramachandran plot of NMR derived bundle of 1, calculated by PROCHECK<sup>i</sup> software.

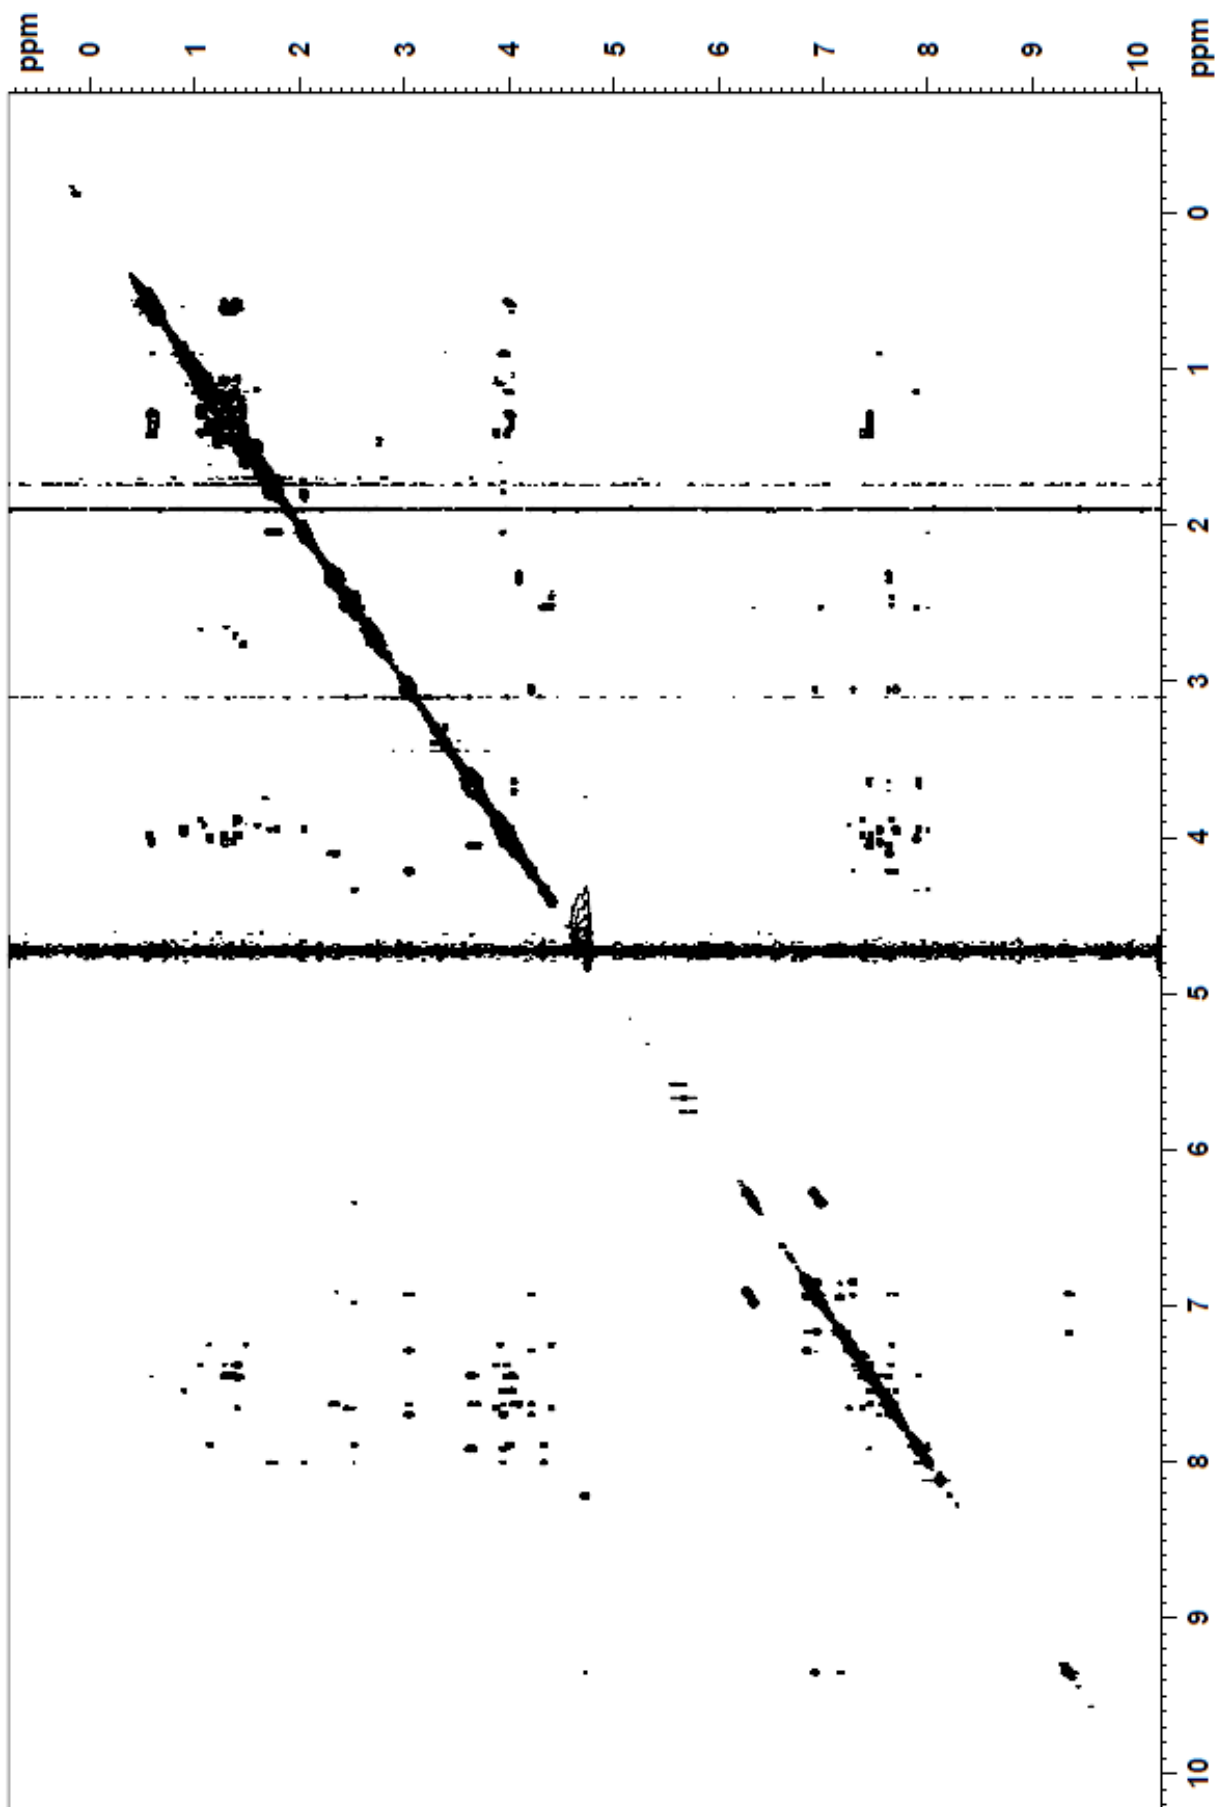

**Figure S19.** 2D-NOESY spectrum of 4 HFA/H<sub>2</sub>O solution (600 MHz, 300 K,  $t_{\text{mix}} = 300$  ms).

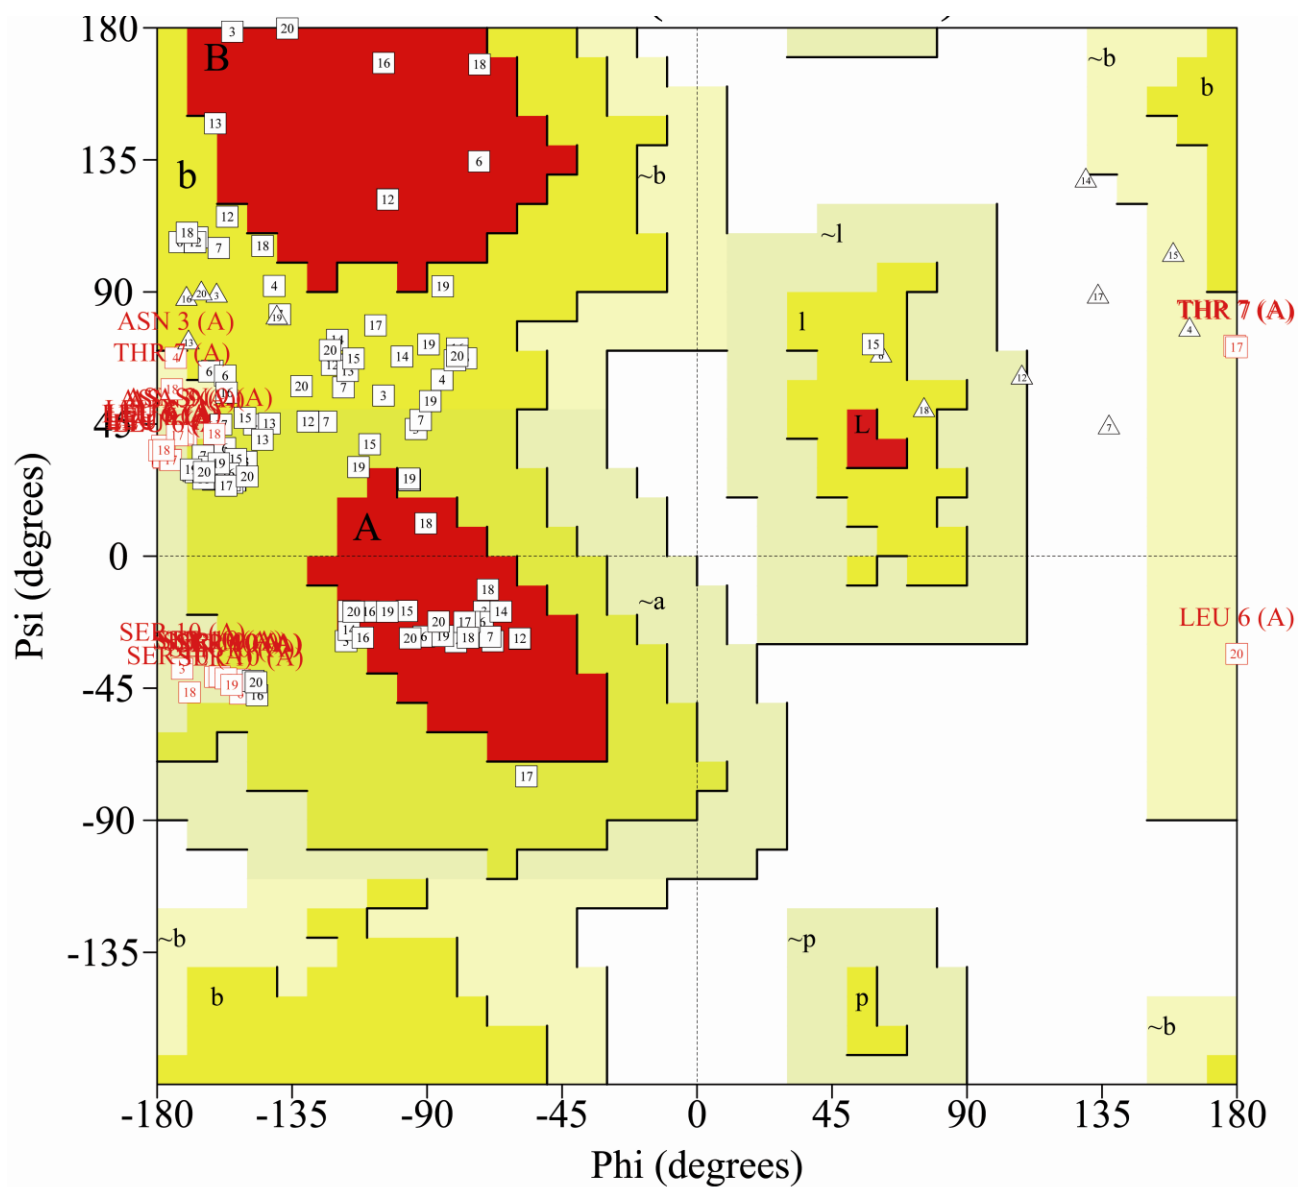

**Figure S20.** Ramachandran plot of NMR derived bundle of **4**, calculated by PROCHECK<sup>i</sup> software.



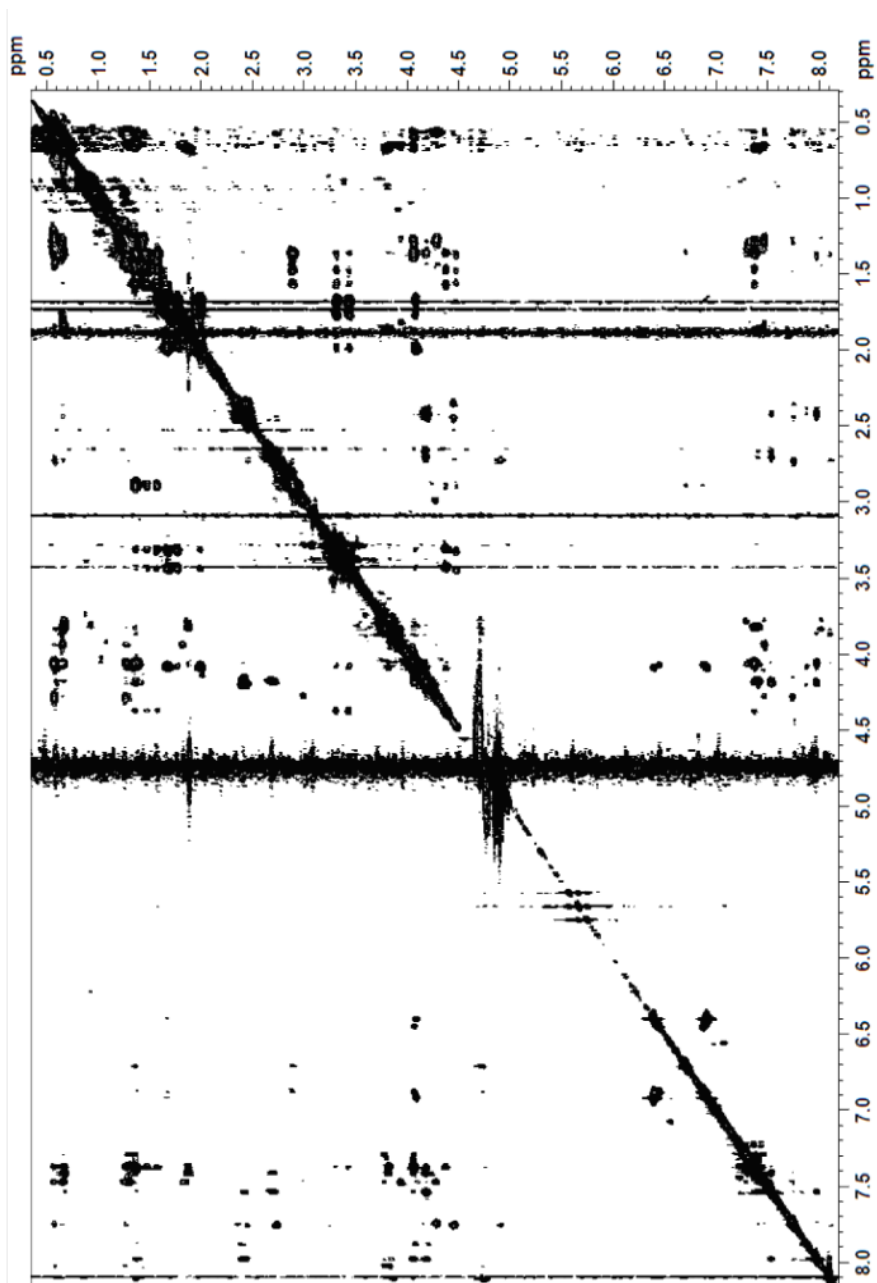

**Figure S21.** 2D-NOESY spectrum of **13** HFA/H<sub>2</sub>O solution (600 MHz, 300 K,  $t_{\text{mix}} = 500$  ms).

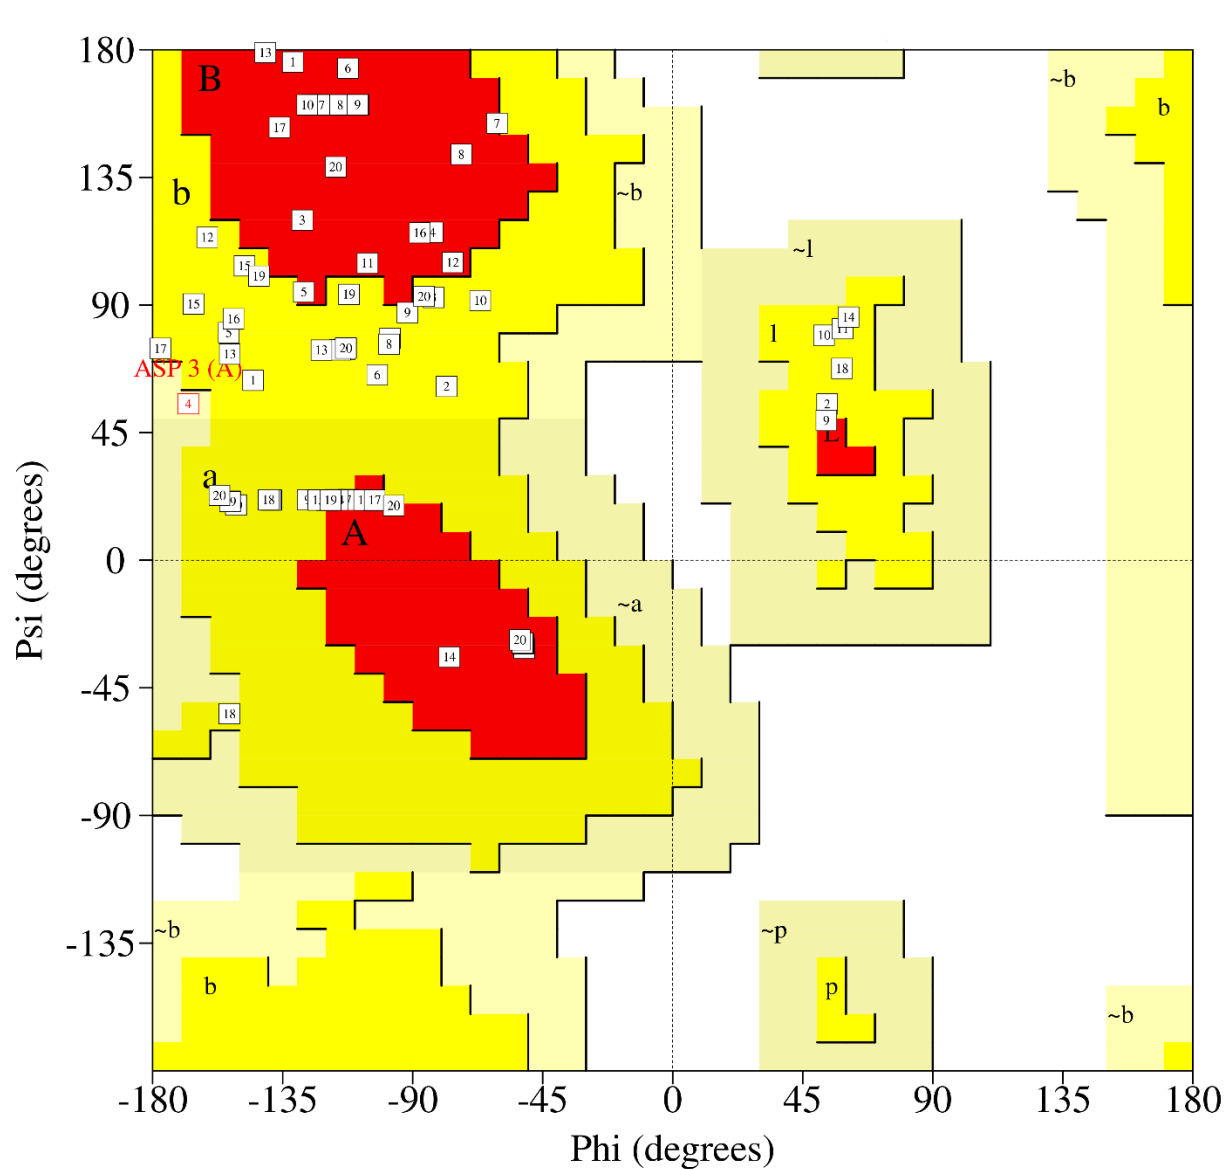

**Figure S22.** Ramachandran plot of NMR derived bundle of **13**, calculated by PROCHECK<sup>i</sup> software.

## References

- [i] Laskowski, R. A., Rullmann, J. A., MacArthur, M. W., Kaptein, R., Thornton, J. M. AQUA and PROCHECK-NMR: programs for checking the quality of protein structures solved by NMR. *J. Biomol. NMR.* **8**, 477-486 (1996).
